# Supplementary material for: Linker permethylation as a means to foster valence tautomerism and thwart dimerization in ferrocenyl-triarylmethylium cations
Source: Royal Society of Chemistry journal article supplement (doi:10.1039/d3dt00857f), 2023-01-01
Supplement: d3dt00857f1.pdf [file d3dt00857f1.pdf]

## Supporting Information

### Linker Permethylation as a Means to Foster Valence Tautomerism and Thwart Dimerization in Ferrocenyl-Triarylmethylium Cations

Moritz Nau,<sup>a</sup> Larissa A. Casper,<sup>a</sup> Gernot Haug,<sup>a</sup> Michael Linseis<sup>a</sup>, Serhiy Demeshko<sup>b</sup> and  
Rainer F. Winter<sup>a\*</sup>

---

<sup>a</sup> *Fachbereich Chemie, Universität Konstanz, Universitätsstraße 10, 78457 Konstanz (Germany); E-mail: rainer.winter@uni-konstanz.de.*

<sup>b</sup> *Institut für Anorganische Chemie, Georg-August-Universität Göttingen, Tammanstraße 4, 37077 Göttingen (Germany)*

**General Methods.** All syntheses and sample preparations were performed under an atmosphere of purified nitrogen with dry, distilled, and degassed solvents with standard Schlenk and glovebox techniques. Commercially available starting materials were used as purchased. Thioxanthone was prepared according to the literature procedure.<sup>1</sup>  $\text{NBu}_4^+ [\text{B}\{\text{C}_6\text{H}_3(\text{CF}_3)_2\text{-3,5}\}_4]^-$  was used as supporting electrolyte in all electrochemical measurements and was synthesized according to an established two-step procedure starting from 3,5-bis(trifluoromethyl)bromobenzene to first give  $\text{Na}^+ [\text{B}\{\text{C}_6\text{H}_3(\text{CF}_3)_2\text{-3,5}\}_4]^-$ ,<sup>2</sup> which was subsequently subjected to a cation exchange reaction.<sup>3</sup> BROOKHART'S acid was synthesized following a published protocol,<sup>4</sup> and was used for the conversion of the carbinol precursor into the corresponding cation.

**NMR spectroscopy.**  $^1\text{H}$ -NMR (400 MHz),  $^{19}\text{F}$ -NMR (376 MHz), and  $^{13}\text{C}$ -NMR (101 MHz) spectra were recorded on a Bruker Avance III 400 spectrometer in the solvent indicated at room temperature (if not stated otherwise). The spectra were referenced to the residual protonated solvent ( $^1\text{H}$ ) or the solvent signal ( $^{13}\text{C}$ ).  $^{19}\text{F}$ -NMR spectra were referenced to the external reference of the spectrometer ( $\delta(^{19}\text{F}) = 0$  ppm for  $\text{CFCl}_3$ ).

**ESI mass spectrometry.** Mass spectra were recorded on a LTQ Orbitrap Velos (Thermo Scientific) with ESI capable of a resolution of at least 60000 in  $\text{CH}_2\text{Cl}_2$  as a solvent. The spectrometer was calibrated with the Pierce LTQ Velos ESI Positive Calibration Solution (Thermo Fisher Scientific) prior to every measurement. Detection was done in the positive-ion mode. The observed data were compared to respective simulations of the molecules' MS patterns.

**Elemental analysis.** A C, H, N-analyzer (model Elementar vario MICRO Cube) by *Heraeus* was used for combustion analyses.

**Cyclic voltammetry.** Cyclic voltammetry was performed under an atmosphere of argon. The voltammograms were recorded using a BASi Epsilon potentiostat and a cell with a platinum electrode ( $\varnothing = 1.1$  mm, BASi). The platinum electrode was polished before each measurement with diamond pastes with particle sizes of 1  $\mu\text{m}$  and 0.25  $\mu\text{m}$  from *Buehler & Witz*. An AgCl and a spiral-shaped Pt wire was used as the reference and counter electrode.  $\text{NBu}_4^+ [\text{B}\{\text{C}_6\text{H}_3(\text{CF}_3)_2\text{-3,5}\}_4]^-$  was used in a concentration of 0.1 mM in  $\text{CH}_2\text{Cl}_2$  as a supporting electrolyte. The redox potentials were calculated *versus* the  $\text{Fch}/\text{Fch}^+$  redox couple.

**EPR spectroscopy.** Electron paramagnetic resonance (EPR) studies were conducted on a X-band spectrometer MiniScope MS5000 by Magnettech GmbH with the program ESR Studio 1.63.0.<sup>5</sup> A liquid nitrogen cooled thermostat was used in combination with the temperature controller HO3. EPR samples in dichloromethane were prepared and sealed inside a glovebox. All experiments were performed with identical measurement parameters:  $B = 330$  mT-345 mT, Sweep Time = 60 s, modulation = 0.3 mT, power = 6.3096 mW. The spin counting method for the determination of the amount of diradical valence tautomer and dimerization was applied according to the literature.<sup>6</sup> Simulation of the measured EPR spectra was performed using the *Matlab* Easyspin program 'garlic'.<sup>7</sup>

X-band EPR spectra at 10 K (samples in dichloromethane) were recorded on an ELEXSYS E580 spectrometer equipped with a super-high-Q probe head (both from *Bruker BioSpin*). Temperature control was realized with an ESR900 cryostat in combination with an intelligent temperature controller ITC503 (both from *Oxford Instruments*) with liquid helium used as a cooling agent. Experimental settings were adjusted to avoid any overmodulation and saturation effects:<sup>8</sup> Microwave frequency of 9.4 GHz, microwave attenuation of 36 dB, modulation ampli-

tude of 3 G, sweep width of 6000 G, and number of points of 8192. Data were baseline-corrected by subtracting a first-order polynomial. A background signal originating from the solvent was used for further corrections.<sup>1</sup>

**Mössbauer spectroscopy.** Samples used for Mössbauer spectroscopy were freshly prepared under inert gas atmosphere. A *WissEl* Mössbauer spectrometer with a <sup>57</sup>Co source in a Rh matrix, an alternating constant acceleration, and a *Janis* closed-cycle helium cryostat were operated in the transmission mode to record the spectra. Simulation of the recorded data was done with the *Mfit* program using *Lorentzian* line doublets.<sup>9</sup> The isomer shifts are given relative to iron metal at ambient temperature.<sup>1</sup>

**X-ray diffraction analysis.** X-ray diffraction analysis was performed using an STOE IPDS-II diffractometer equipped with a graphite-monochromated Mo-K<sub>α</sub> radiation source ( $\lambda_{\text{Mo}} = 0.71073 \text{ \AA}$ ). For detection, an image plate system at  $T = 100.15 \text{ K}$  was used. The X-Area software package was used for data processing. Structures were solved using OLEX<sup>10</sup> with the ShelXT<sup>11</sup> structure solution program using intrinsic phase position. A semiempirical absorption correction was performed and the structure was solved by the heavy-atom method. Refinement was achieved with the ShelXL<sup>12</sup> package. All non-hydrogen atoms were refined with anisotropic displacement parameters, and hydrogen atoms were introduced in a riding model.<sup>13</sup> Crystallographic data were deposited at the Cambridge Crystallographic Data Centre and are available under deposition number CCDC 2240663.

**Quantum chemical calculations.** Quantum chemical calculations based on density functional theory (DFT) employed the Gaussian 16 program package.<sup>14</sup> Geometry optimization was followed by vibrational analysis. All calculations were performed in 1,2-dichloroethane as the solvent applying the polarizable continuum model (PCM).<sup>15</sup> Electronic spectra were calculated at the optimized ground-state structures by the time-dependent-DFT method. A Wachter basis set<sup>16</sup> was used for the Fe atom, and a 6-316(d)<sup>17</sup> polarized double- $\xi$  basis set with PBE0<sup>18,19</sup> as correlation and exchange functional was used for the remaining atoms. The GaussSum,<sup>20</sup> Avogadro, GNU Parallel and vmd program packages were used in combination with POV-Ray for data processing,<sup>21</sup> and graphical representations.<sup>21,22</sup>

**Absorption spectroscopy.** All UV/Vis/NIR spectra were acquired with a TIDAS fiber optic diode array spectrometer, which consists of a combination of MCS UV/Vis and PGS NIR instruments from *j&m Analytic AG*. For the determination of the extinction coefficients, quartz cells with an optical path length of 0.1 cm, 0.5 cm, or 1 cm were used, which were purchased from *Hellma Analytics*.

## Synthetic route for the BAR<sup>F24+</sup> salt of FcDurSXanth<sup>CF3</sup>.

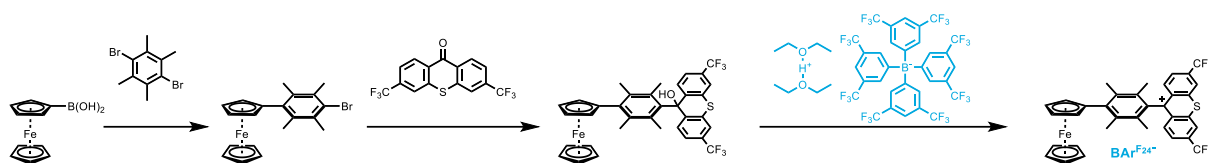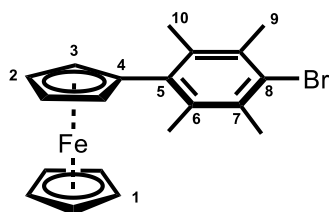

### 4-Ferrocenyl-(2,3,5,6-tetramethyl)bromobenzene

Ferrocene boronic acid (305.70 mg, 1.33 mmol, 1.00 eq.), 3,6-dibromodurene (388.38 mg, 1.33 mmol, 1.00 eq.) and Pd(dppf)Cl<sub>2</sub> (9.73 mg, 13.30 μmol, 0.01 eq.) were dissolved in degassed dimethyl glycol (15 mL). 2 M aqueous NaOH (239.98 mg, 2 mL, 6.00 mmol, 4.51 eq.) was added and the resulting solution was

heated to 80° C for two days in a high-pressure reaction tube (suitable up to 12 bar). After quenching with water, the solution was extracted with CH<sub>2</sub>Cl<sub>2</sub> and the combined organic phases were dried over Na<sub>2</sub>SO<sub>4</sub>. The crude product was purified by column chromatography on silica (*n*-pentane/ethyl acetate 1:0 - 1:4) to obtain 142 mg (0.36 mmol) of 4-ferrocenyl-(2,3,5,6-tetramethyl)-phenyl bromide as an orange solid in 27% yield.

<sup>1</sup>H-NMR (CD<sub>2</sub>Cl<sub>2</sub>, 400 MHz) δ [ppm] = 4.37 (vt, <sup>3</sup>J<sub>HH</sub> = 1.6 Hz, 2H, H-2/3), 4.23 (vt, <sup>3</sup>J<sub>HH</sub> = 1.6 Hz, 2H, H-2/3), 4.17 (s, 5H, H-1), 2.54 (s, 6H, H-9/10), 2.46 (s, 6H, H-9/10).

<sup>13</sup>C{<sup>1</sup>H}-NMR (CD<sub>2</sub>Cl<sub>2</sub>, 101 MHz) δ [ppm] = 135.3 (C-6/7), 134.3 (C-6/7), 128.1 (C-8), 87.8 (C-5), 87.5 (C-4), 72.4 (C-2/3), 69.7 (C-1), 67.1 (C-2/3), 21.7 (C-9/10), 20.8 (C-9/10).

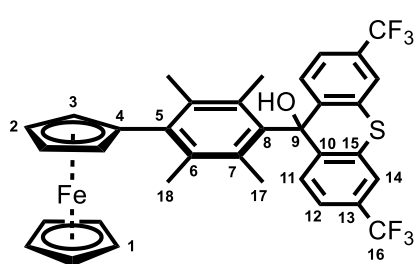

### 4-Ferrocenyl-(2,6-dimethyl)-phenyl-3,6-(di-trifluoromethyl)-10-thioxanthy methyl alcohol (FcDurSXanth<sup>CF3</sup>-OH)

4-Ferrocenyl-(2,3,5,6-tetramethyl)bromobenzene (40 mg, 0.10 mmol, 1.00 eq.) was dissolved in dry, degassed THF (2 mL). The solution was cooled to -78 °C and <sup>t</sup>BuLi (1.9 M in hexane, 12.90 mg, 0.11 mL, 0.20 mmol, 2.00 eq.) was

added dropwise. The solution was stirred for one hour at -78 °C and subsequently without cooling for further 30 minutes and the cooled again to -78 °C. 3,6-Bis(trifluoromethyl)-9*H*-thioxanthen-9-one (35.08 mg, 0.10 mmol, 1.00 eq.) was prepared according to a published procedure,<sup>1</sup> dissolved in dry, degassed THF (2 mL), and added dropwise to the reaction mixture at -78 °C. A color change to brown was observed. The resulting mixture was stirred for one hour at -78 °C and then allowed to warm to room temperature and stirred overnight. Subsequently, the solution was heated to reflux for five hours. Then, the reaction was quenched by the addition of water (5 mL). Et<sub>2</sub>O was added, the phases were separated and the aqueous phase was further extracted with Et<sub>2</sub>O (3×50 mL). The combined organic phases were dried over Na<sub>2</sub>SO<sub>4</sub> and the solvent was removed *in vacuo*. The crude product was purified by column chromatography on silica (PE/EE 1:0-93:7) and dried *in vacuo*. 18.20 mg (27.31 μmol) of target compound FcDurSXanth<sup>CF3</sup>-OH were obtained as an orange solid in 27% yield.

**<sup>1</sup>H-NMR** (CD<sub>2</sub>Cl<sub>2</sub>, 400 MHz) δ [ppm] = 7.72 (d, <sup>4</sup>J<sub>FH</sub> = 0.7 Hz, 2H, H-14), 7.38 (dd, <sup>3</sup>J<sub>HH</sub> = 8.3 Hz, <sup>4</sup>J<sub>FH</sub> = 1.1 Hz, 2H, H-12), 7.29 (d, <sup>3</sup>J<sub>HH</sub> = 8.4 Hz, 2H, H-11), 4.42 (vt, <sup>3</sup>J<sub>HH</sub> = 1.8 Hz, 2H, H-3), 4.31 (vt, <sup>3</sup>J<sub>HH</sub> = 1.8 Hz, 2H, H-2), 4.20 (s, 5H, H-1), 2.92 – 2.11 (m, 13H, H-17/18+OH).

**<sup>13</sup>C{<sup>1</sup>H}-NMR** (CD<sub>2</sub>Cl<sub>2</sub>, 101 MHz) δ [ppm] = 142.9 (C-13), 138.3 (C-9), 136.1 (C-8), 135.9 (C-5), 130.6 (C-15), 130.2 (C-7), 130.0 (C-6), 129.9 (C-11), 123.9 (d, <sup>1</sup>J<sub>CF</sub> = 273 Hz, C-16), 123.6 (q, <sup>3</sup>J<sub>CF</sub> = 3.5 Hz, C-12), 123.3 (q, <sup>3</sup>J<sub>CF</sub> = 3.9 Hz, C-14), 88.4 (C-4), 80.6 (C-5), 72.8 (C-2), 70.0 (C-1), 67.5 (C-3), 15.5 (C-18), 14.4 (C-17).

**<sup>19</sup>F{<sup>1</sup>H}-NMR** (CD<sub>2</sub>Cl<sub>2</sub>, 376 MHz) δ [ppm] = -62.1 (s, -CF<sub>3</sub>-16).

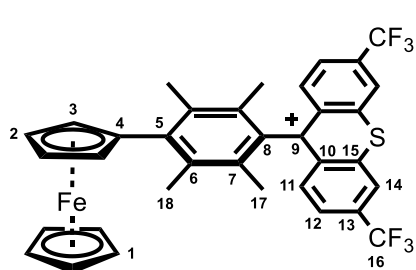

**4-Ferrocenyl-(2,3,5,6-tetramethyl)phenyl-3,6-(di-trifluoromethyl)-10-thioxanthyl methylum (FcDurSXanth<sup>CF3</sup>)**

The carbinol precursor **FcDurSXanth<sup>CF3</sup>-OH** was dissolved in dry, degassed CH<sub>2</sub>Cl<sub>2</sub> and was treated with exactly 1 eq. of BROOKHART's acid, which was prepared to a literature-known procedure.<sup>4,23</sup> The solution colour immediately changed to an intense violet. The solvent was removed under reduced pressure to give **FcDurSXanth<sup>CF3+</sup>** in quantitative yield as a brown solid.

**ESI-MS** *calc.* for C<sub>35</sub>H<sub>27</sub>F<sub>6</sub>FeS<sup>+</sup>  $\frac{m}{z}$  = 649.1082 (M<sup>+</sup>); *found* 649.1090 (measured in CH<sub>2</sub>Cl<sub>2</sub>, calibrated).

**Elemental Analysis** *calcd.* for C<sub>67</sub>H<sub>39</sub>BF<sub>30</sub>FeS: 53.20% C, 2.60% H; *found* 53.04% C, 3.08% H.

## NMR spectroscopy and mass spectrometry

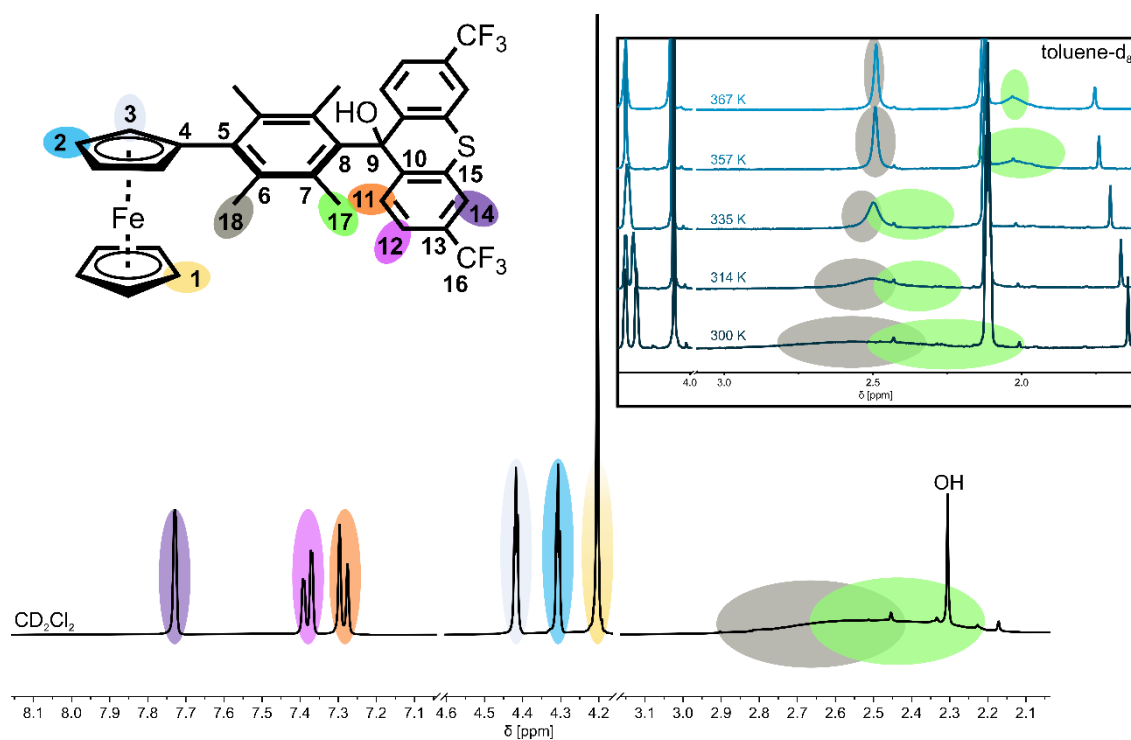

**Figure S1** | <sup>1</sup>H-NMR spectrum of **FcDurSXanth<sup>CF<sub>3</sub></sup>-OH** in CD<sub>2</sub>Cl<sub>2</sub> at 298 K; insert: *T*-dependent <sup>1</sup>H-NMR spectra (400 MHz) from 300 K (±0.1 K) to 367 K (±0.1 K) in toluene-d<sub>6</sub>.

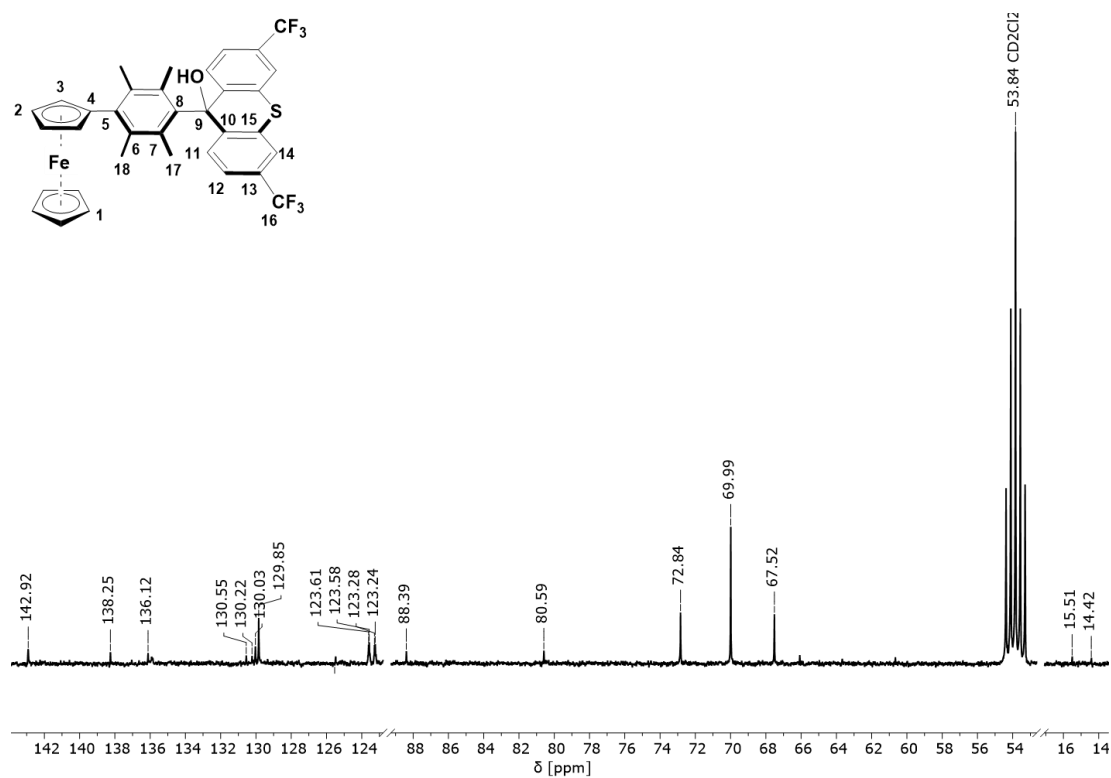

**Figure S2** | <sup>13</sup>C{<sup>1</sup>H}-NMR spectrum of compound **FcDurSXanth<sup>CF<sub>3</sub></sup>-OH** measured in CD<sub>2</sub>Cl<sub>2</sub>.

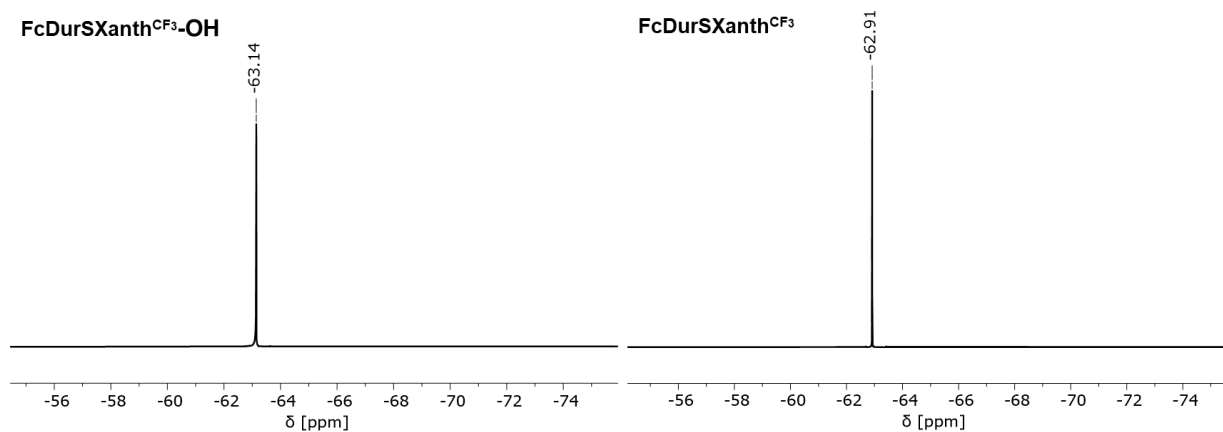

**Figure S3** |  $^{19}\text{F}\{^1\text{H}\}$ -NMR (376 MHz) spectra of the carbinol precursor **FcDurSXanth<sup>CF<sub>3</sub>-OH</sup>** (left) and the respective cation **FcDurSXanth<sup>CF<sub>3</sub></sup>** (right).

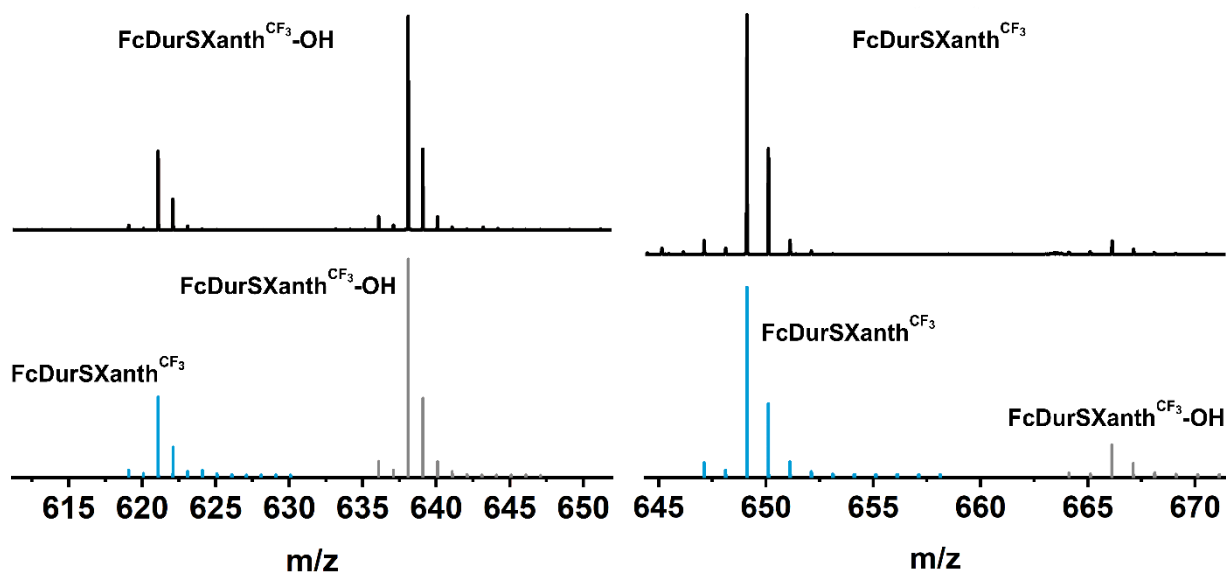

**Figure S4** | Experimental (black) and simulated (blue, cation; grey, carbinol) data from mass spectrometry of **FcDurSXanth<sup>CF<sub>3</sub></sup>** and **FcDurSXanth<sup>CF<sub>3</sub>-OH</sup>**.

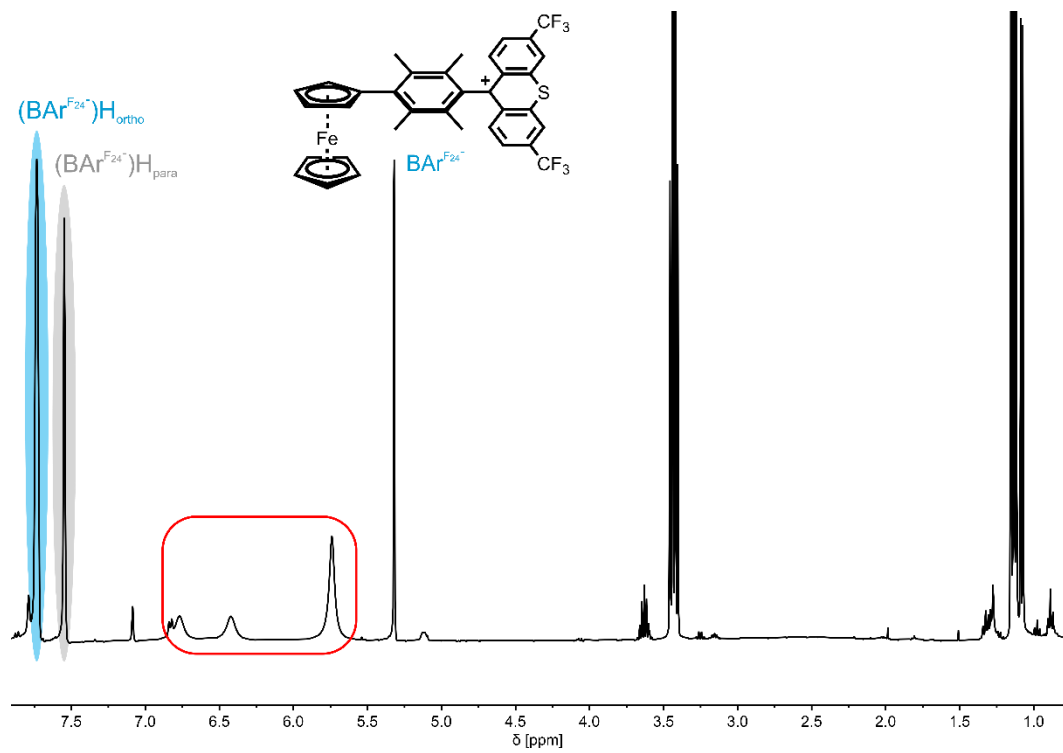

Figure S5 |  $^1\text{H-NMR}$  spectrum of  $\text{FcDurSXanth}^{\text{CF}_3+}$  in  $\text{CD}_2\text{Cl}_2$  at 298 K.



## UV-Vis-NIR Spectroscopy

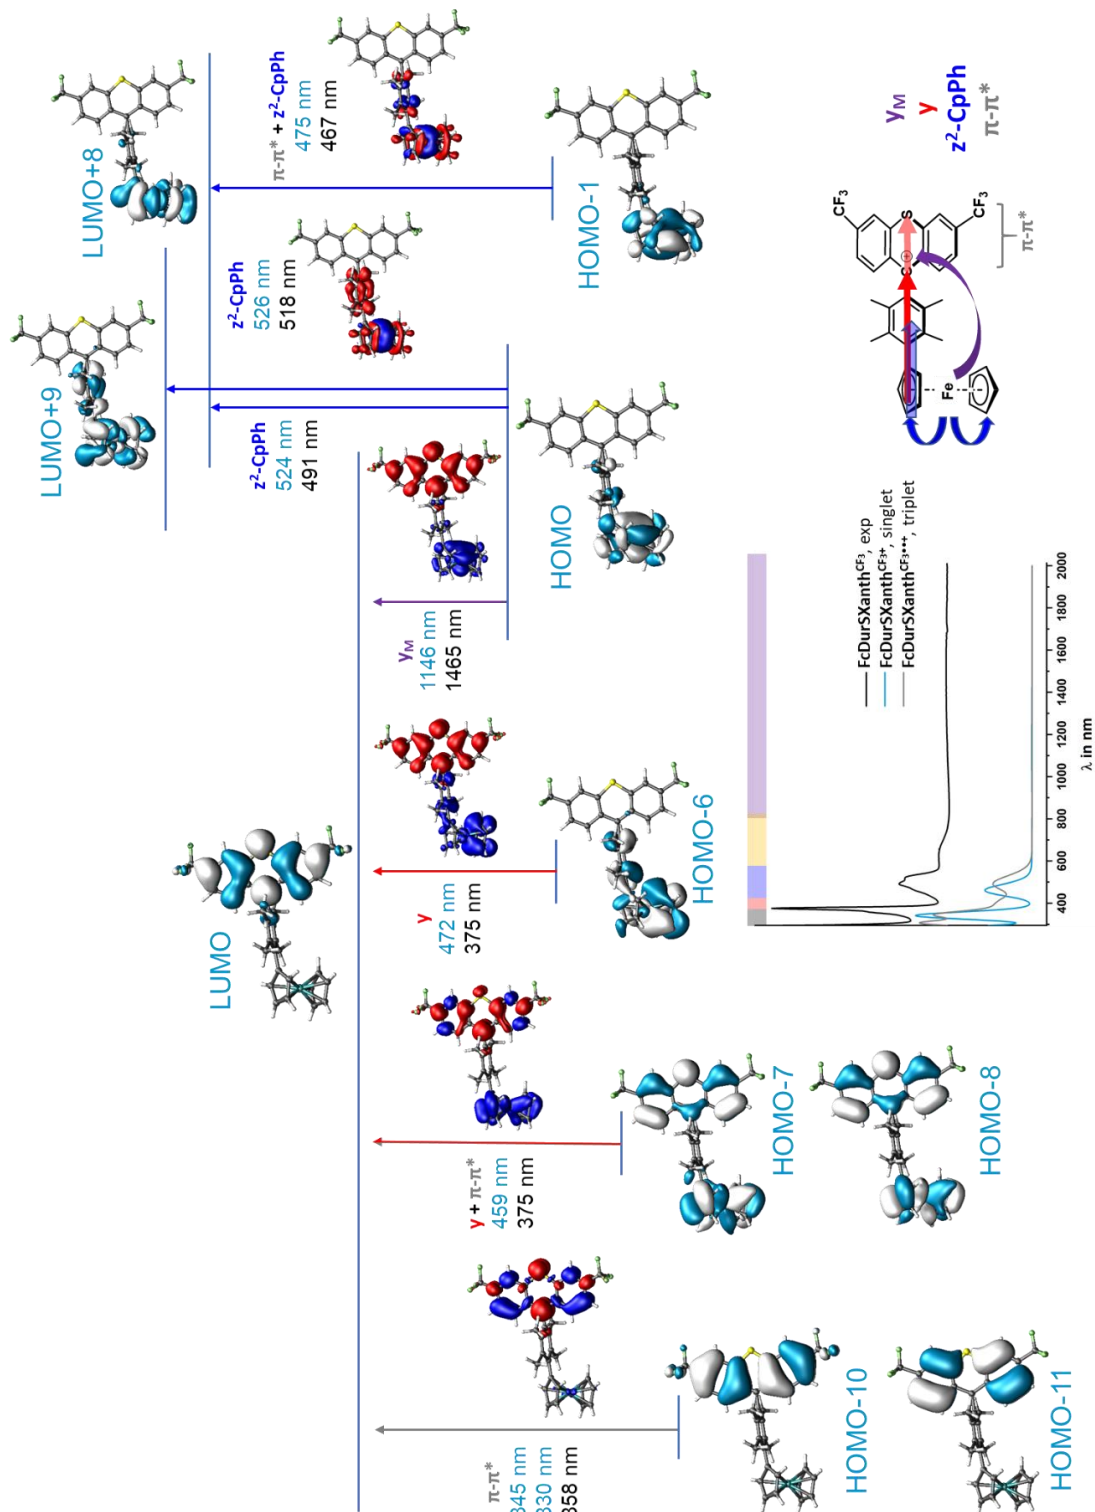

**Figure S6** | TD-DFT-computed molecular orbital contributions to major transitions calculated for complex  $\text{FcDurSXanth}^{\text{CF}_3+}$  with EDDMs (electron density difference maps, blue: electron loss, red: electron gain). The experimental (TD-DFT calculated) spectrum and data given in black (blue).

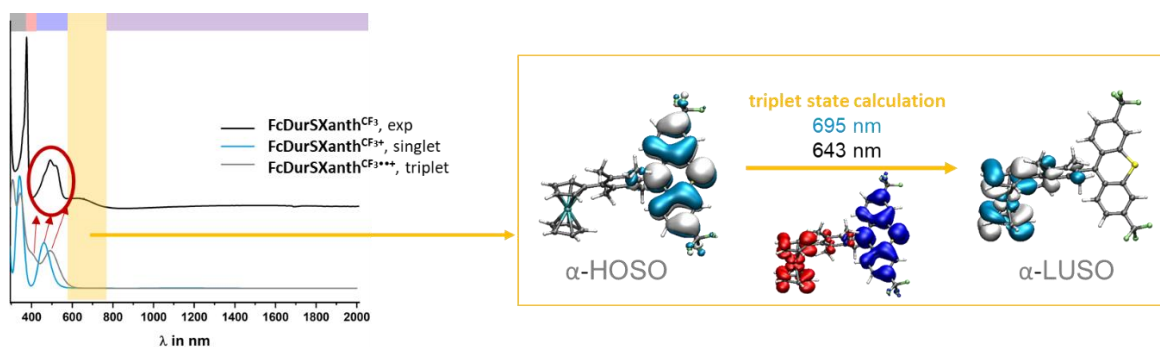

**Figure S7** | TD-DFT computed and experimental UV/vis/NIR spectra (left) and the  $\alpha$ -HOSO to  $\alpha$ -LUSO transition of the triplet state of the diradical valence tautomer of  $\text{FcDurSXanth}^{\text{CF}_3}$  (right). For the EDDM plots, blue/red colors indicate a loss/gain of electron density.

## Cyclic Voltammetry

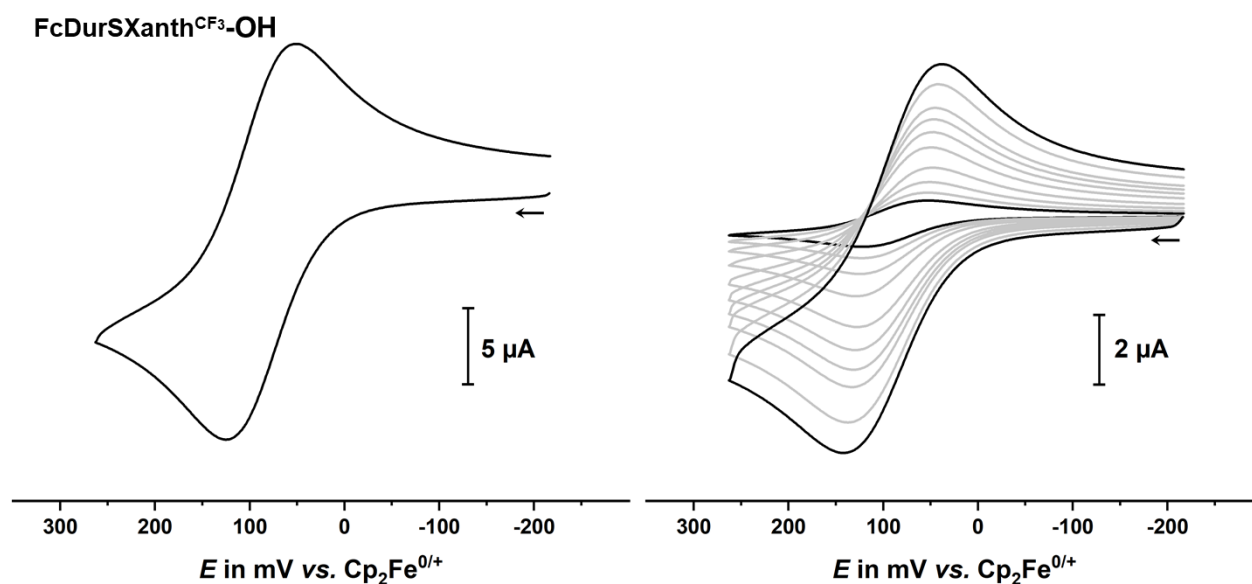

**Figure S8** | Cyclic voltammograms of  $\text{FcDurSXanth}^{\text{CF}_3}\text{-OH}$  between (0.1 mM  ${}^n\text{Bu}_4\text{N}^+\text{BAR}^{\text{F}_24^-}$ ) measured at a scan rate of  $100 \text{ mVs}^{-1}$  (left) and at different scan rates ranging from  $25 \text{ mVs}^{-1}$  to  $2000 \text{ mVs}^{-1}$  (right).

### FcDurSXanth<sup>CF<sub>3</sub><sup>+</sup></sup>

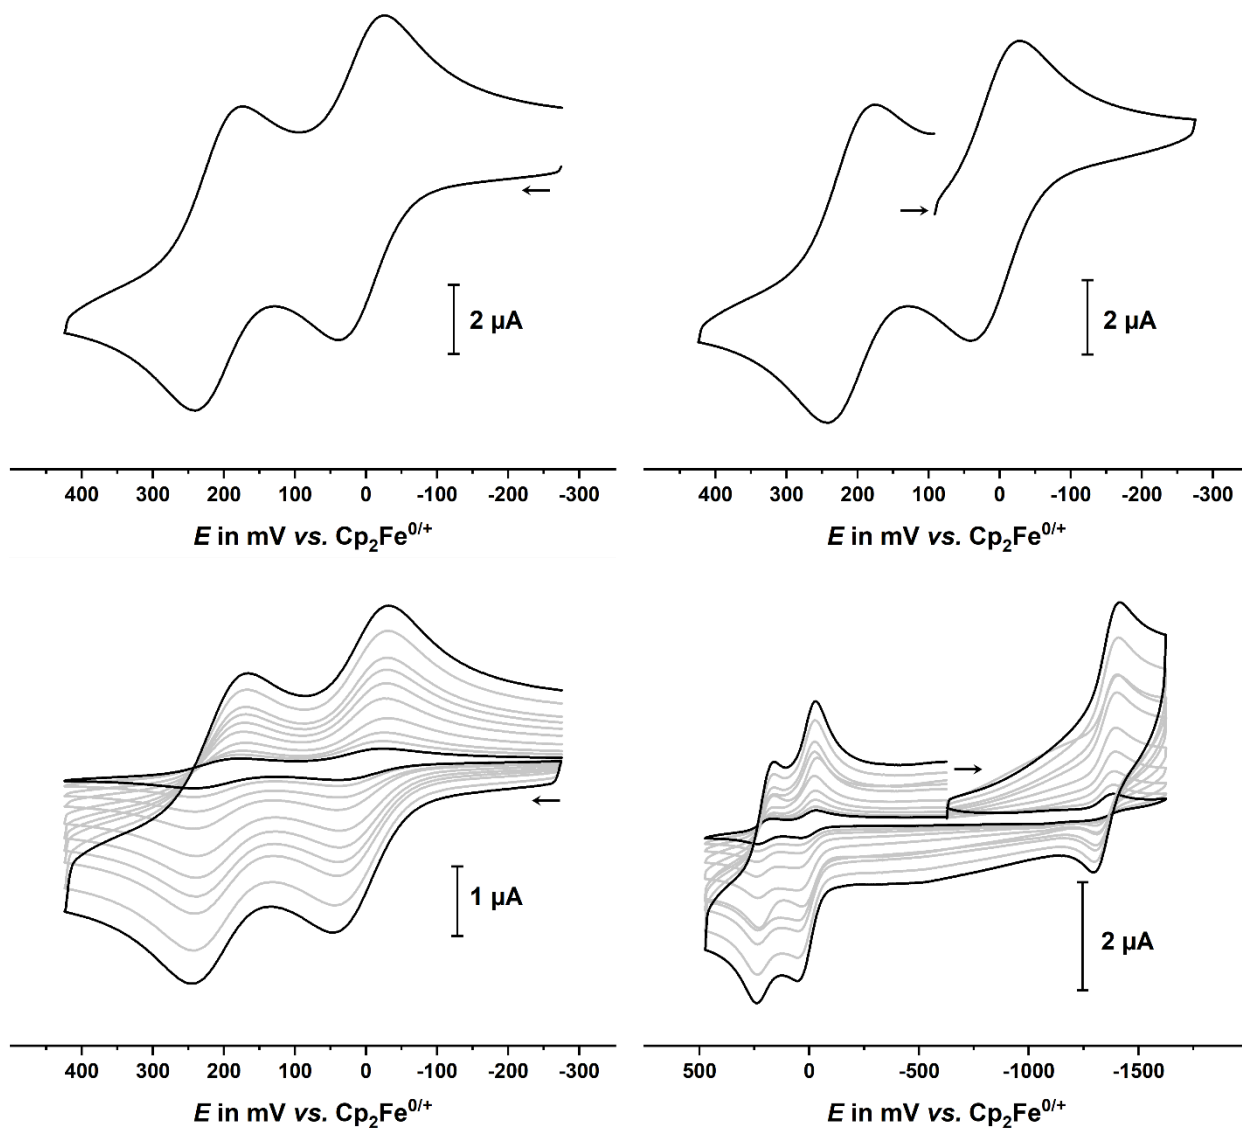

**Figure S9** | Cyclic voltammograms of FcDurSXanth<sup>CF<sub>3</sub><sup>+</sup></sup> (0.1 mM <sup>n</sup>Bu<sub>4</sub>N<sup>+</sup>BAr<sup>F<sub>2</sub><sup>+</sup></sup>) measured at a scan rate of 100 mVs<sup>-1</sup> (upper part) and at different scan rates ranging from 25 mVs<sup>-1</sup> to 2000 mVs<sup>-1</sup> (bottom). The figure on the top right shows a scan initiated from the resting potential.

**Table S1** | Electrochemical data of the complex cation **FcDurSXanth**<sup>CF<sub>3</sub>+</sup> (in 0.1 mM <sup>n</sup>Bu<sub>4</sub>N<sup>+</sup>BAR<sup>F<sub>2</sub>4<sup>-</sup> in CH<sub>2</sub>Cl<sub>2</sub>).</sup>

| <b>Scan rate</b><br>[mVs <sup>-1</sup> ] | $E_{1/2}^{+/2+}$<br>[mV] | $\Delta E_p$<br>[mV] | $E_{1/2}^{+/0}$<br>[mV] | $\Delta E_p$<br>[mV] | $E_{1/2}^{0/-}$<br>[mV] | $\Delta E_p$<br>[mV] |
|------------------------------------------|--------------------------|----------------------|-------------------------|----------------------|-------------------------|----------------------|
| <b>25</b>                                | 215                      | 65                   | 15                      | 60                   | -1330                   | 65                   |
| <b>50</b>                                | 210                      | 70                   | 10                      | 60                   | -1340                   | 60                   |
| <b>100</b>                               | 205                      | 75                   | 5                       | 60                   | -1345                   | 70                   |
| <b>200</b>                               | 200                      | 75                   | 5                       | 65                   | -1355                   | 85                   |
| <b>400</b>                               | 195                      | 65                   | 5                       | 75                   | -1355                   | 80                   |
| <b>600</b>                               | 190                      | 65                   | -15                     | 55                   | -1360                   | 90                   |
| <b>800</b>                               | 205                      | 65                   | 15                      | 70                   | -1350                   | 90                   |
| <b>1000</b>                              | 200                      | 70                   | 5                       | 70                   | -1355                   | 100                  |
| <b>1500</b>                              | 185                      | 70                   | -5                      | 75                   | -1370                   | 105                  |
| <b>2000</b>                              | 190                      | 80                   | -5                      | 75                   | -1370                   | 115                  |

## X-ray crystallography

**Table S2** | Crystal data and structure refinement for **FcDurSXanth**<sup>CF<sub>3</sub><sup>+</sup> BAR<sup>F<sub>24</sub><sup>-</sup></sup>.</sup>

|                                                |                                                                |
|------------------------------------------------|----------------------------------------------------------------|
| Empirical formula                              | C <sub>67</sub> H <sub>39</sub> BF <sub>30</sub> FeS           |
| Formula weight                                 | 1512.70                                                        |
| Temperature/K                                  | 100.0                                                          |
| Crystal system                                 | triclinic                                                      |
| Space group                                    | $P\bar{1}$                                                     |
| $a/\text{\AA}$                                 | 11.9778(3)                                                     |
| $b/\text{\AA}$                                 | 12.5044(3)                                                     |
| $c/\text{\AA}$                                 | 21.1080(6)                                                     |
| $\alpha/^\circ$                                | 80.916(2)                                                      |
| $\beta/^\circ$                                 | 75.471(2)                                                      |
| $\gamma/^\circ$                                | 85.239(2)                                                      |
| Volume/ $\text{\AA}^3$                         | 3018.86(14)                                                    |
| $Z$                                            | 2                                                              |
| $\rho_{\text{calc}}/\text{g/cm}^3$             | 1.664                                                          |
| $\mu/\text{mm}^{-1}$                           | 0.422                                                          |
| $F(000)$                                       | 1516.0                                                         |
| Crystal size/ $\text{mm}^3$                    | 0.35 × 0.06 × 0.06                                             |
| Radiation                                      | MoK $\alpha$ ( $\lambda = 0.71073$ )                           |
| 2 $\theta$ range for data collection/ $^\circ$ | 5.954 to 55.114                                                |
| Index ranges                                   | $-15 \leq h \leq 15, -16 \leq k \leq 14, -27 \leq l \leq 27$   |
| Reflections collected                          | 31264                                                          |
| Independent reflections                        | 13839 [ $R_{\text{int}} = 0.0287, R_{\text{sigma}} = 0.0423$ ] |
| Data/restraints/parameters                     | 13839/0/906                                                    |
| Goodness-of-fit on $F^2$                       | 1.088                                                          |
| Final R indexes [ $ I  \geq 2\sigma(I)$ ]      | $R_1 = 0.0461, wR_2 = 0.1094$                                  |
| Final R indexes [all data]                     | $R_1 = 0.0814, wR_2 = 0.1394$                                  |
| Largest diff. peak/hole / $e \text{\AA}^{-3}$  | 0.73/-0.75                                                     |

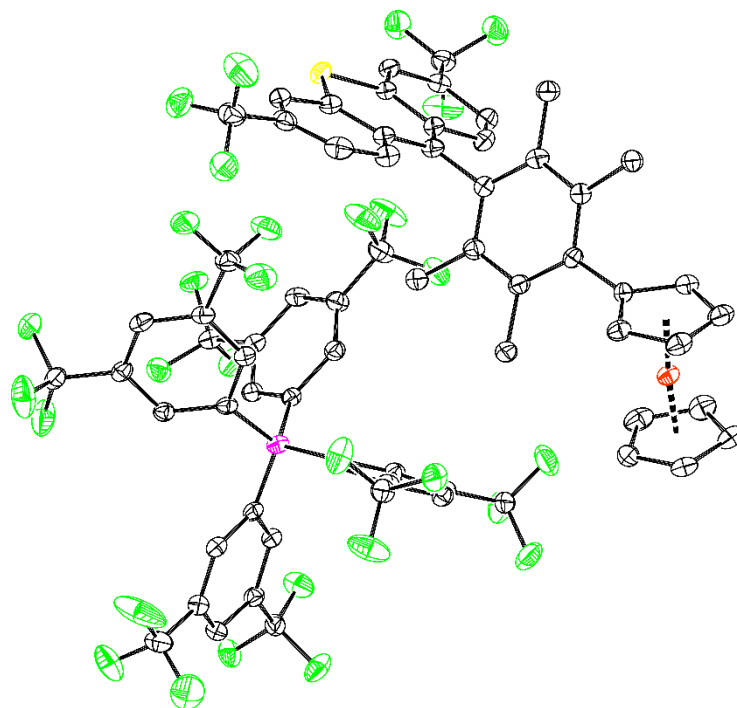

**Figure S10** | ORTEP of  $\text{FcDurSXanth}^{\text{CF}_3^+} \text{BARF}^{\text{F}_{24}^-}$ . Hydrogen atoms are omitted for reasons of clarity. Ellipsoids are displayed at a 50% probability level.

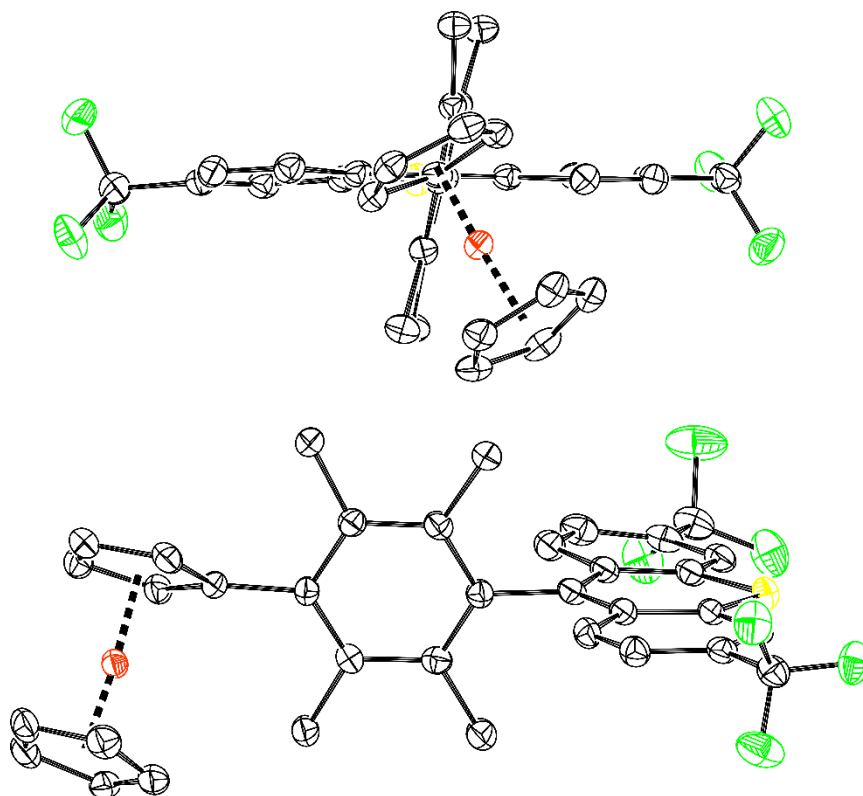

**Figure 11** | Two different perspective views of the complex cation  $\text{FcDurSXanth}^{\text{CF}_3^+}$  in the  $\text{BARF}^{\text{F}_{24}^-}$  salt. Ellipsoids are drawn at the 50% probability level. Hydrogen atoms and counter anion are omitted for reasons of clarity.

**Table S3** | Crystallographically determined bond lengths of **FcDurSXanth<sup>CF<sub>3</sub><sup>+</sup></sup>BAR<sup>F<sub>24</sub><sup>-</sup></sup>**.

| Atom | Atom | Length/Å | Atom | Atom | Length/Å |
|------|------|----------|------|------|----------|
| Fe1  | C36  | 2.051(3) | F9   | C31  | 1.345(3) |
| Fe1  | C37  | 2.040(3) | F10  | C8   | 1.336(3) |
| Fe1  | C38  | 2.042(3) | F11  | C8   | 1.340(3) |
| Fe1  | C39  | 2.043(3) | F12  | C8   | 1.352(4) |
| Fe1  | C40  | 2.044(3) | F13  | C32  | 1.339(4) |
| Fe1  | C41  | 2.032(3) | F14  | C23  | 1.330(4) |
| Fe1  | C42  | 2.027(3) | F15  | C31  | 1.330(3) |
| Fe1  | C43  | 2.035(3) | F16  | C23  | 1.346(4) |
| Fe1  | C44  | 2.053(3) | F17  | C32  | 1.346(3) |
| Fe1  | C45  | 2.084(3) | F18  | C7   | 1.334(3) |
| S1   | C63  | 1.701(3) | F19  | C7   | 1.323(3) |
| S1   | C64  | 1.704(3) | F20  | C23  | 1.333(4) |
| F1   | C61  | 1.324(4) | F21  | C16  | 1.329(4) |
| F2   | C61  | 1.341(4) | F22  | C7   | 1.331(3) |
| F3   | C61  | 1.329(4) | F23  | C16  | 1.331(4) |
| F4   | C67  | 1.337(3) | F24  | C16  | 1.307(4) |
| F5   | C67  | 1.323(3) | F25  | C24  | 1.343(3) |
| F6   | C67  | 1.333(3) | F26  | C15  | 1.346(3) |
| C33  | C34  | 1.359(4) | F27  | C32  | 1.332(3) |
| C33  | C66  | 1.408(4) | F28  | C24  | 1.345(3) |
| C34  | C35  | 1.424(4) | F29  | C24  | 1.350(3) |
| C35  | C56  | 1.412(4) | F30  | C31  | 1.327(3) |
| C35  | C64  | 1.421(4) | C1   | C2   | 1.398(4) |
| C36  | C37  | 1.414(4) | C1   | C6   | 1.398(4) |
| C36  | C40  | 1.417(4) | C1   | B1   | 1.639(4) |
| C37  | C38  | 1.422(4) | C2   | C3   | 1.389(4) |
| C38  | C39  | 1.416(4) | C3   | C4   | 1.381(4) |
| C39  | C40  | 1.402(4) | C3   | C8   | 1.490(4) |
| C41  | C42  | 1.419(4) | C4   | C5   | 1.391(4) |
| C41  | C45  | 1.429(4) | C5   | C6   | 1.389(4) |
| C42  | C43  | 1.417(4) | C5   | C7   | 1.491(4) |
| C43  | C44  | 1.424(4) | C9   | C10  | 1.397(4) |
| C44  | C45  | 1.419(4) | C9   | C14  | 1.398(4) |
| C45  | C46  | 1.501(4) | C9   | B1   | 1.637(4) |
| C46  | C47  | 1.416(4) | C10  | C11  | 1.386(4) |
| C46  | C54  | 1.401(4) | C11  | C12  | 1.390(4) |
| C47  | C48  | 1.517(4) | C11  | C16  | 1.495(4) |
| C47  | C49  | 1.393(4) | C12  | C13  | 1.392(4) |
| C49  | C50  | 1.514(4) | C13  | C14  | 1.393(4) |
| C49  | C51  | 1.400(4) | C13  | C15  | 1.491(4) |
| C51  | C52  | 1.398(4) | C17  | C18  | 1.404(4) |
| C51  | C56  | 1.496(4) | C17  | C22  | 1.395(4) |
| C52  | C53  | 1.507(4) | C17  | B1   | 1.628(4) |
| C52  | C54  | 1.409(4) | C18  | C19  | 1.383(4) |
| C54  | C55  | 1.508(4) | C19  | C20  | 1.400(4) |
| C56  | C57  | 1.420(4) | C19  | C24  | 1.483(4) |
| C57  | C58  | 1.422(4) | C20  | C21  | 1.381(4) |
| C57  | C63  | 1.422(4) | C21  | C22  | 1.395(4) |
| C58  | C59  | 1.367(4) | C21  | C23  | 1.482(4) |
| C59  | C60  | 1.411(4) | C25  | C26  | 1.399(4) |
| C60  | C61  | 1.506(4) | C25  | C30  | 1.409(4) |
| C60  | C62  | 1.362(4) | C25  | B1   | 1.632(4) |
| C62  | C63  | 1.416(4) | C26  | C27  | 1.387(4) |
| C64  | C65  | 1.407(4) | C27  | C28  | 1.389(4) |
| C65  | C66  | 1.371(4) | C27  | C32  | 1.489(4) |
| C66  | C67  | 1.501(4) | C28  | C29  | 1.389(4) |
| F7   | C15  | 1.343(3) | C29  | C30  | 1.389(4) |
| F8   | C15  | 1.332(3) | C29  | C31  | 1.493(4) |

**Table S4** | Crystallographically determined bond angles of **FcDurSXanth<sup>CF<sub>3</sub><sup>+</sup></sup>BAR<sup>F<sub>24</sub><sup>-</sup></sup>**.

| Atom | Atom | Atom | Angle <sup>o</sup> | Atom | Atom | Atom | Angle <sup>o</sup> |
|------|------|------|--------------------|------|------|------|--------------------|
| C36  | Fe1  | C44  | 129.93(12)         | C60  | C62  | C63  | 118.9(3)           |
| C36  | Fe1  | C45  | 112.36(11)         | C57  | C63  | S1   | 123.9(2)           |
| C37  | Fe1  | C36  | 40.44(13)          | C62  | C63  | S1   | 115.3(2)           |
| C37  | Fe1  | C38  | 40.76(12)          | C62  | C63  | C57  | 120.9(3)           |
| C37  | Fe1  | C39  | 68.36(13)          | C35  | C64  | S1   | 124.1(2)           |
| C37  | Fe1  | C40  | 68.09(13)          | C65  | C64  | S1   | 114.9(2)           |
| C37  | Fe1  | C44  | 165.03(12)         | C65  | C64  | C35  | 121.0(2)           |
| C37  | Fe1  | C45  | 126.75(12)         | C66  | C65  | C64  | 119.0(3)           |
| C38  | Fe1  | C36  | 68.07(12)          | C33  | C66  | C67  | 118.6(3)           |
| C38  | Fe1  | C39  | 40.57(12)          | C65  | C66  | C33  | 121.4(3)           |
| C38  | Fe1  | C40  | 67.84(12)          | C65  | C66  | C67  | 120.0(3)           |
| C38  | Fe1  | C44  | 154.13(12)         | F4   | C67  | C66  | 110.8(2)           |
| C38  | Fe1  | C45  | 160.67(12)         | F5   | C67  | F4   | 107.5(2)           |
| C39  | Fe1  | C36  | 67.97(12)          | F5   | C67  | F6   | 107.4(2)           |
| C39  | Fe1  | C40  | 40.11(12)          | F5   | C67  | C66  | 112.8(2)           |
| C39  | Fe1  | C44  | 122.15(12)         | F6   | C67  | F4   | 106.7(2)           |
| C39  | Fe1  | C45  | 158.70(12)         | F6   | C67  | C66  | 111.4(2)           |
| C40  | Fe1  | C36  | 40.49(12)          | C2   | C1   | B1   | 120.0(2)           |
| C40  | Fe1  | C44  | 112.10(12)         | C6   | C1   | C2   | 115.5(2)           |
| C40  | Fe1  | C45  | 125.99(11)         | C6   | C1   | B1   | 123.4(2)           |
| C41  | Fe1  | C36  | 122.26(13)         | C3   | C2   | C1   | 122.6(3)           |
| C41  | Fe1  | C37  | 106.05(13)         | C2   | C3   | C8   | 118.0(3)           |
| C41  | Fe1  | C38  | 121.61(12)         | C4   | C3   | C2   | 120.6(2)           |
| C41  | Fe1  | C39  | 158.26(12)         | C4   | C3   | C8   | 121.3(3)           |
| C41  | Fe1  | C40  | 159.21(12)         | C3   | C4   | C5   | 118.3(2)           |
| C41  | Fe1  | C43  | 68.67(12)          | C4   | C5   | C7   | 119.0(2)           |
| C41  | Fe1  | C44  | 68.18(12)          | C6   | C5   | C4   | 120.4(2)           |
| C41  | Fe1  | C45  | 40.59(11)          | C6   | C5   | C7   | 120.5(2)           |
| C42  | Fe1  | C36  | 154.17(13)         | C5   | C6   | C1   | 122.6(2)           |
| C42  | Fe1  | C37  | 116.89(13)         | F18  | C7   | C5   | 112.5(2)           |
| C42  | Fe1  | C38  | 102.48(13)         | F19  | C7   | F18  | 105.4(2)           |
| C42  | Fe1  | C39  | 121.24(12)         | F19  | C7   | F22  | 105.9(3)           |
| C42  | Fe1  | C40  | 159.79(12)         | F19  | C7   | C5   | 113.8(2)           |
| C42  | Fe1  | C41  | 40.94(12)          | F22  | C7   | F18  | 105.5(2)           |
| C42  | Fe1  | C43  | 40.84(12)          | F22  | C7   | C5   | 113.0(2)           |
| C42  | Fe1  | C44  | 68.49(12)          | F10  | C8   | F11  | 106.6(2)           |
| C42  | Fe1  | C45  | 68.42(11)          | F10  | C8   | F12  | 106.0(2)           |
| C43  | Fe1  | C36  | 164.97(13)         | F10  | C8   | C3   | 113.6(3)           |
| C43  | Fe1  | C37  | 151.71(13)         | F11  | C8   | F12  | 105.0(2)           |
| C43  | Fe1  | C38  | 116.73(12)         | F11  | C8   | C3   | 112.2(2)           |
| C43  | Fe1  | C39  | 105.76(12)         | F12  | C8   | C3   | 112.8(2)           |
| C43  | Fe1  | C40  | 126.13(13)         | C10  | C9   | C14  | 116.5(2)           |
| C43  | Fe1  | C44  | 40.79(11)          | C10  | C9   | B1   | 121.1(2)           |
| C43  | Fe1  | C45  | 68.22(11)          | C14  | C9   | B1   | 122.2(2)           |
| C44  | Fe1  | C45  | 40.12(11)          | C11  | C10  | C9   | 122.0(3)           |
| C63  | S1   | C64  | 103.97(14)         | C10  | C11  | C12  | 120.8(3)           |
| C34  | C33  | C66  | 119.9(3)           | C10  | C11  | C16  | 120.4(3)           |
| C33  | C34  | C35  | 121.5(3)           | C12  | C11  | C16  | 118.8(2)           |
| C56  | C35  | C34  | 120.3(2)           | C11  | C12  | C13  | 118.2(2)           |
| C56  | C35  | C64  | 122.5(2)           | C12  | C13  | C14  | 120.6(3)           |
| C64  | C35  | C34  | 117.3(3)           | C12  | C13  | C15  | 118.2(2)           |
| C37  | C36  | Fe1  | 69.37(17)          | C14  | C13  | C15  | 121.2(2)           |
| C37  | C36  | C40  | 107.7(3)           | C13  | C14  | C9   | 121.9(3)           |
| C40  | C36  | Fe1  | 69.51(17)          | F7   | C15  | F26  | 105.5(2)           |
| C36  | C37  | Fe1  | 70.18(17)          | F7   | C15  | C13  | 112.0(2)           |
| C36  | C37  | C38  | 107.8(3)           | F8   | C15  | F7   | 106.8(2)           |
| C38  | C37  | Fe1  | 69.69(17)          | F8   | C15  | F26  | 106.3(2)           |
| C37  | C38  | Fe1  | 69.56(16)          | F8   | C15  | C13  | 113.3(2)           |
| C39  | C38  | Fe1  | 69.74(17)          | F26  | C15  | C13  | 112.5(2)           |
| C39  | C38  | C37  | 107.9(3)           | F21  | C16  | F23  | 103.8(3)           |
| C38  | C39  | Fe1  | 69.69(16)          | F21  | C16  | C11  | 113.0(3)           |
| C40  | C39  | Fe1  | 70.00(16)          | F23  | C16  | C11  | 111.6(3)           |
| C40  | C39  | C38  | 108.0(3)           | F24  | C16  | F21  | 105.9(3)           |
| C36  | C40  | Fe1  | 70.01(17)          | F24  | C16  | F23  | 107.8(3)           |
| C39  | C40  | Fe1  | 69.88(16)          | F24  | C16  | C11  | 114.1(2)           |
| C39  | C40  | C36  | 108.5(3)           | C18  | C17  | B1   | 121.4(2)           |
| C42  | C41  | Fe1  | 69.33(16)          | C22  | C17  | C18  | 115.7(2)           |
| C42  | C41  | C45  | 108.5(3)           | C22  | C17  | B1   | 121.5(2)           |
| C45  | C41  | Fe1  | 71.67(15)          | C19  | C18  | C17  | 122.5(2)           |
| C41  | C42  | Fe1  | 69.74(17)          | C18  | C19  | C20  | 120.5(3)           |
| C43  | C42  | Fe1  | 69.89(17)          | C18  | C19  | C24  | 120.5(2)           |
| C43  | C42  | C41  | 107.9(3)           | C20  | C19  | C24  | 119.0(2)           |
| C42  | C43  | Fe1  | 69.27(17)          | C21  | C20  | C19  | 118.1(3)           |



|     |     |     |            |     |     |     |          |
|-----|-----|-----|------------|-----|-----|-----|----------|
| C42 | C43 | C44 | 107.8(3)   | C20 | C21 | C22 | 120.7(3) |
| C44 | C43 | Fe1 | 70.29(16)  | C20 | C21 | C23 | 120.7(3) |
| C43 | C44 | Fe1 | 68.93(17)  | C22 | C21 | C23 | 118.4(3) |
| C45 | C44 | Fe1 | 71.14(16)  | C21 | C22 | C17 | 122.4(3) |
| C45 | C44 | C43 | 108.7(3)   | F14 | C23 | F16 | 105.6(2) |
| C41 | C45 | Fe1 | 67.73(15)  | F14 | C23 | F20 | 106.8(3) |
| C41 | C45 | C46 | 124.4(2)   | F14 | C23 | C21 | 113.6(3) |
| C44 | C45 | Fe1 | 68.74(15)  | F16 | C23 | C21 | 111.9(3) |
| C44 | C45 | C41 | 107.0(2)   | F20 | C23 | F16 | 105.2(3) |
| C44 | C45 | C46 | 127.7(2)   | F20 | C23 | C21 | 113.1(2) |
| C46 | C45 | Fe1 | 136.78(19) | F25 | C24 | F28 | 106.0(2) |
| C47 | C46 | C45 | 117.0(2)   | F25 | C24 | F29 | 106.0(2) |
| C54 | C46 | C45 | 123.3(2)   | F25 | C24 | C19 | 113.0(2) |
| C54 | C46 | C47 | 119.6(2)   | F28 | C24 | F29 | 105.6(2) |
| C46 | C47 | C48 | 121.5(2)   | F28 | C24 | C19 | 113.0(2) |
| C49 | C47 | C46 | 120.5(2)   | F29 | C24 | C19 | 112.6(2) |
| C49 | C47 | C48 | 117.9(2)   | C26 | C25 | C30 | 115.9(2) |
| C47 | C49 | C50 | 120.7(2)   | C26 | C25 | B1  | 123.0(2) |
| C47 | C49 | C51 | 118.8(2)   | C30 | C25 | B1  | 120.8(2) |
| C51 | C49 | C50 | 120.5(2)   | C27 | C26 | C25 | 122.6(3) |
| C49 | C51 | C56 | 119.5(2)   | C26 | C27 | C28 | 120.3(3) |
| C52 | C51 | C49 | 121.9(2)   | C26 | C27 | C32 | 119.8(3) |
| C52 | C51 | C56 | 118.2(2)   | C28 | C27 | C32 | 119.9(2) |
| C51 | C52 | C53 | 121.8(2)   | C29 | C28 | C27 | 118.6(3) |
| C51 | C52 | C54 | 118.8(2)   | C28 | C29 | C30 | 120.7(3) |
| C54 | C52 | C53 | 119.4(2)   | C28 | C29 | C31 | 118.7(2) |
| C46 | C54 | C52 | 120.2(2)   | C30 | C29 | C31 | 120.6(3) |
| C46 | C54 | C55 | 122.6(2)   | C29 | C30 | C25 | 121.9(3) |
| C52 | C54 | C55 | 117.2(2)   | F9  | C31 | C29 | 111.4(2) |
| C35 | C56 | C51 | 119.9(2)   | F15 | C31 | F9  | 106.3(2) |
| C35 | C56 | C57 | 122.8(3)   | F15 | C31 | C29 | 112.4(2) |
| C57 | C56 | C51 | 117.3(2)   | F30 | C31 | F9  | 105.5(2) |
| C56 | C57 | C58 | 120.0(3)   | F30 | C31 | F15 | 106.9(2) |
| C56 | C57 | C63 | 122.5(3)   | F30 | C31 | C29 | 113.7(2) |
| C58 | C57 | C63 | 117.5(3)   | F13 | C32 | F17 | 105.6(3) |
| C59 | C58 | C57 | 120.9(3)   | F13 | C32 | C27 | 113.0(2) |
| C58 | C59 | C60 | 120.1(3)   | F17 | C32 | C27 | 111.9(2) |
| C59 | C60 | C61 | 118.6(3)   | F27 | C32 | F13 | 106.4(2) |
| C62 | C60 | C59 | 121.4(3)   | F27 | C32 | F17 | 106.1(2) |
| C62 | C60 | C61 | 119.9(3)   | F27 | C32 | C27 | 113.2(2) |
| F1  | C61 | F2  | 107.6(3)   | C9  | B1  | C1  | 113.1(2) |
| F1  | C61 | F3  | 106.8(3)   | C17 | B1  | C1  | 100.3(2) |
| F1  | C61 | C60 | 111.5(3)   | C17 | B1  | C9  | 114.7(2) |
| F2  | C61 | C60 | 110.8(3)   | C17 | B1  | C25 | 112.7(2) |
| F3  | C61 | F2  | 106.6(2)   | C25 | B1  | C1  | 112.4(2) |
| F3  | C61 | C60 | 113.2(3)   | C25 | B1  | C9  | 104.0(2) |

**Table 5** | Crystallographically determined torsion angles of **FcDurSXanth<sup>CF<sub>3</sub><sup>+</sup></sup>BAR<sup>F<sub>24</sub><sup>-</sup></sup>**.

| A   | B   | C   | D   | Angle <sup>o</sup> | A   | B   | C   | D   | Angle <sup>o</sup> |
|-----|-----|-----|-----|--------------------|-----|-----|-----|-----|--------------------|
| Fe1 | C36 | C37 | C38 | 59.8(2)            | C1  | C2  | C3  | C8  | -175.7(3)          |
| Fe1 | C36 | C40 | C39 | -59.5(2)           | C2  | C1  | C6  | C5  | -0.6(4)            |
| Fe1 | C37 | C38 | C39 | 59.4(2)            | C2  | C1  | B1  | C9  | 162.7(2)           |
| Fe1 | C38 | C39 | C40 | 59.7(2)            | C2  | C1  | B1  | C17 | -74.6(3)           |
| Fe1 | C39 | C40 | C36 | 59.5(2)            | C2  | C1  | B1  | C25 | 45.3(3)            |
| Fe1 | C41 | C42 | C43 | -59.7(2)           | C2  | C3  | C4  | C5  | -1.8(4)            |
| Fe1 | C41 | C45 | C44 | 57.65(19)          | C2  | C3  | C8  | F10 | 177.6(2)           |
| Fe1 | C41 | C45 | C46 | -132.4(3)          | C2  | C3  | C8  | F11 | 56.6(4)            |
| Fe1 | C42 | C43 | C44 | -60.0(2)           | C2  | C3  | C8  | F12 | -61.8(3)           |
| Fe1 | C43 | C44 | C45 | -60.27(19)         | C3  | C4  | C5  | C6  | 0.5(4)             |
| Fe1 | C44 | C45 | C41 | -57.03(19)         | C3  | C4  | C5  | C7  | -176.3(3)          |
| Fe1 | C44 | C45 | C46 | 133.4(3)           | C4  | C3  | C8  | F10 | -0.1(4)            |
| Fe1 | C45 | C46 | C47 | -140.0(2)          | C4  | C3  | C8  | F11 | -121.1(3)          |
| Fe1 | C45 | C46 | C54 | 42.7(4)            | C4  | C3  | C8  | F12 | 120.5(3)           |
| S1  | C64 | C65 | C66 | -177.0(2)          | C4  | C5  | C6  | C1  | 0.7(4)             |
| C33 | C34 | C35 | C56 | -178.9(2)          | C4  | C5  | C7  | F18 | 46.1(4)            |
| C33 | C34 | C35 | C64 | 1.1(4)             | C4  | C5  | C7  | F19 | 165.9(3)           |
| C33 | C66 | C67 | F4  | -55.6(3)           | C4  | C5  | C7  | F22 | -73.2(3)           |
| C33 | C66 | C67 | F5  | -176.1(2)          | C6  | C1  | C2  | C3  | -0.7(4)            |
| C33 | C66 | C67 | F6  | 62.9(3)            | C6  | C1  | B1  | C9  | -30.0(3)           |
| C34 | C33 | C66 | C65 | -0.3(4)            | C6  | C1  | B1  | C17 | 92.6(3)            |
| C34 | C33 | C66 | C67 | -179.3(2)          | C6  | C1  | B1  | C25 | -147.4(2)          |
| C34 | C35 | C56 | C51 | -0.9(4)            | C6  | C5  | C7  | F18 | -130.7(3)          |
| C34 | C35 | C56 | C57 | -179.8(2)          | C6  | C5  | C7  | F19 | -10.9(4)           |
| C34 | C35 | C64 | S1  | 176.2(2)           | C6  | C5  | C7  | F22 | 110.0(3)           |
| C34 | C35 | C64 | C65 | -1.4(4)            | C7  | C5  | C6  | C1  | 177.5(2)           |
| C35 | C56 | C57 | C58 | -176.5(2)          | C8  | C3  | C4  | C5  | 175.9(3)           |
| C35 | C56 | C57 | C63 | 4.5(4)             | C9  | C10 | C11 | C12 | 0.8(4)             |
| C35 | C64 | C65 | C66 | 0.8(4)             | C9  | C10 | C11 | C16 | -179.7(3)          |
| C36 | C37 | C38 | Fe1 | -60.1(2)           | C10 | C9  | C14 | C13 | 1.1(4)             |
| C36 | C37 | C38 | C39 | -0.7(3)            | C10 | C9  | B1  | C1  | -39.1(3)           |
| C37 | C36 | C40 | Fe1 | 59.0(2)            | C10 | C9  | B1  | C17 | -153.3(2)          |
| C37 | C36 | C40 | C39 | -0.4(3)            | C10 | C9  | B1  | C25 | 83.2(3)            |
| C37 | C38 | C39 | Fe1 | -59.3(2)           | C10 | C11 | C12 | C13 | 0.7(4)             |
| C37 | C38 | C39 | C40 | 0.4(3)             | C10 | C11 | C16 | F21 | 126.9(3)           |
| C38 | C39 | C40 | Fe1 | -59.5(2)           | C10 | C11 | C16 | F23 | -116.6(3)          |
| C38 | C39 | C40 | C36 | 0.0(3)             | C10 | C11 | C16 | F24 | 5.9(4)             |
| C40 | C36 | C37 | Fe1 | -59.1(2)           | C11 | C12 | C13 | C14 | -1.2(4)            |
| C40 | C36 | C37 | C38 | 0.7(3)             | C11 | C12 | C13 | C15 | 178.3(2)           |
| C41 | C42 | C43 | Fe1 | 59.6(2)            | C12 | C11 | C16 | F21 | -53.5(4)           |
| C41 | C42 | C43 | C44 | -0.4(3)            | C12 | C11 | C16 | F23 | 63.0(4)            |
| C41 | C45 | C46 | C47 | -46.7(4)           | C12 | C11 | C16 | F24 | -174.5(3)          |
| C41 | C45 | C46 | C54 | 136.0(3)           | C12 | C13 | C14 | C9  | 0.3(4)             |
| C42 | C41 | C45 | Fe1 | -59.78(19)         | C12 | C13 | C15 | F7  | -73.4(3)           |
| C42 | C41 | C45 | C44 | -2.1(3)            | C12 | C13 | C15 | F8  | 165.7(2)           |
| C42 | C41 | C45 | C46 | 167.8(2)           | C12 | C13 | C15 | F26 | 45.1(3)            |
| C42 | C43 | C44 | Fe1 | 59.3(2)            | C14 | C9  | C10 | C11 | -1.6(4)            |
| C42 | C43 | C44 | C45 | -0.9(3)            | C14 | C9  | B1  | C1  | 146.8(2)           |
| C43 | C44 | C45 | Fe1 | 58.91(19)          | C14 | C9  | B1  | C17 | 32.5(4)            |
| C43 | C44 | C45 | C41 | 1.9(3)             | C14 | C9  | B1  | C25 | -91.0(3)           |
| C43 | C44 | C45 | C46 | -167.7(3)          | C14 | C13 | C15 | F7  | 106.1(3)           |
| C44 | C45 | C46 | C47 | 121.2(3)           | C14 | C13 | C15 | F8  | -14.8(4)           |
| C44 | C45 | C46 | C54 | -56.1(4)           | C14 | C13 | C15 | F26 | -135.3(3)          |
| C45 | C41 | C42 | Fe1 | 61.25(19)          | C15 | C13 | C14 | C9  | -179.2(2)          |
| C45 | C41 | C42 | C43 | 1.6(3)             | C16 | C11 | C12 | C13 | -178.9(3)          |
| C45 | C46 | C47 | C48 | -8.3(4)            | C17 | C18 | C19 | C20 | 0.7(4)             |
| C45 | C46 | C47 | C49 | 176.4(2)           | C17 | C18 | C19 | C24 | -177.7(2)          |
| C45 | C46 | C54 | C52 | 179.9(3)           | C18 | C17 | C22 | C21 | 2.0(4)             |
| C45 | C46 | C54 | C55 | 1.7(4)             | C18 | C17 | B1  | C1  | -80.0(3)           |
| C46 | C47 | C49 | C50 | -174.4(3)          | C18 | C17 | B1  | C9  | 41.5(3)            |
| C46 | C47 | C49 | C51 | 6.1(4)             | C18 | C17 | B1  | C25 | 160.3(2)           |
| C47 | C46 | C54 | C52 | 2.7(4)             | C18 | C19 | C20 | C21 | 0.7(4)             |
| C47 | C46 | C54 | C55 | -175.5(3)          | C18 | C19 | C24 | F25 | 144.4(3)           |
| C47 | C49 | C51 | C52 | -2.8(4)            | C18 | C19 | C24 | F28 | 24.1(4)            |
| C47 | C49 | C51 | C56 | 169.6(3)           | C18 | C19 | C24 | F29 | -95.5(3)           |
| C48 | C47 | C49 | C50 | 10.2(4)            | C19 | C20 | C21 | C22 | -0.7(4)            |
| C48 | C47 | C49 | C51 | -169.2(3)          | C19 | C20 | C21 | C23 | -175.4(3)          |
| C49 | C51 | C52 | C53 | -178.9(3)          | C20 | C19 | C24 | F25 | -34.0(4)           |
| C49 | C51 | C52 | C54 | -0.5(4)            | C20 | C19 | C24 | F28 | -154.3(2)          |
| C49 | C51 | C56 | C35 | 82.6(3)            | C20 | C19 | C24 | F29 | 86.0(3)            |
| C49 | C51 | C56 | C57 | -98.5(3)           | C20 | C21 | C22 | C17 | -0.7(4)            |
| C50 | C49 | C51 | C52 | 177.7(3)           | C20 | C21 | C23 | F14 | -16.4(4)           |
| C50 | C49 | C51 | C56 | -9.9(4)            | C20 | C21 | C23 | F16 | 103.1(3)           |

|     |     |     |     |            |     |     |     |     |           |
|-----|-----|-----|-----|------------|-----|-----|-----|-----|-----------|
| C51 | C52 | C54 | C46 | 0.6(4)     | C20 | C21 | C23 | F20 | -138.3(3) |
| C51 | C52 | C54 | C55 | 178.9(3)   | C22 | C17 | C18 | C19 | -2.0(4)   |
| C51 | C56 | C57 | C58 | 4.6(4)     | C22 | C17 | B1  | C1  | 86.0(3)   |
| C51 | C56 | C57 | C63 | -174.4(2)  | C22 | C17 | B1  | C9  | -152.5(2) |
| C52 | C51 | C56 | C35 | -104.7(3)  | C22 | C17 | B1  | C25 | -33.8(3)  |
| C52 | C51 | C56 | C57 | 74.2(3)    | C22 | C21 | C23 | F14 | 168.8(3)  |
| C53 | C52 | C54 | C46 | 179.0(3)   | C22 | C21 | C23 | F16 | -71.8(4)  |
| C53 | C52 | C54 | C55 | -2.7(4)    | C22 | C21 | C23 | F20 | 46.9(4)   |
| C54 | C46 | C47 | C48 | 169.1(3)   | C23 | C21 | C22 | C17 | 174.1(3)  |
| C54 | C46 | C47 | C49 | -6.1(4)    | C24 | C19 | C20 | C21 | 179.1(3)  |
| C56 | C35 | C64 | S1  | -3.8(4)    | C25 | C26 | C27 | C28 | -0.9(4)   |
| C56 | C35 | C64 | C65 | 178.6(2)   | C25 | C26 | C27 | C32 | -179.9(2) |
| C56 | C51 | C52 | C53 | 8.6(4)     | C26 | C25 | C30 | C29 | -0.1(4)   |
| C56 | C51 | C52 | C54 | -173.0(3)  | C26 | C25 | B1  | C1  | 28.9(3)   |
| C56 | C57 | C58 | C59 | -175.7(3)  | C26 | C25 | B1  | C9  | -93.7(3)  |
| C56 | C57 | C63 | S1  | -5.5(4)    | C26 | C25 | B1  | C17 | 141.4(2)  |
| C56 | C57 | C63 | C62 | 174.1(2)   | C26 | C27 | C28 | C29 | 0.4(4)    |
| C57 | C58 | C59 | C60 | 0.9(4)     | C26 | C27 | C32 | F13 | -27.0(4)  |
| C58 | C57 | C63 | S1  | 175.5(2)   | C26 | C27 | C32 | F17 | 92.1(3)   |
| C58 | C57 | C63 | C62 | -4.9(4)    | C26 | C27 | C32 | F27 | -148.0(2) |
| C58 | C59 | C60 | C61 | 178.1(3)   | C27 | C28 | C29 | C30 | 0.1(4)    |
| C58 | C59 | C60 | C62 | -3.9(4)    | C27 | C28 | C29 | C31 | 179.3(2)  |
| C59 | C60 | C61 | F1  | 75.7(4)    | C28 | C27 | C32 | F13 | 154.0(2)  |
| C59 | C60 | C61 | F2  | -44.1(4)   | C28 | C27 | C32 | F17 | -86.9(3)  |
| C59 | C60 | C61 | F3  | -163.8(3)  | C28 | C27 | C32 | F27 | 33.0(4)   |
| C59 | C60 | C62 | C63 | 2.3(4)     | C28 | C29 | C30 | C25 | -0.3(4)   |
| C60 | C62 | C63 | S1  | -178.2(2)  | C28 | C29 | C31 | F9  | 49.2(3)   |
| C60 | C62 | C63 | C57 | 2.1(4)     | C28 | C29 | C31 | F15 | -70.1(3)  |
| C61 | C60 | C62 | C63 | -179.7(3)  | C28 | C29 | C31 | F30 | 168.2(2)  |
| C62 | C60 | C61 | F1  | -102.4(3)  | C30 | C25 | C26 | C27 | 0.7(4)    |
| C62 | C60 | C61 | F2  | 137.8(3)   | C30 | C25 | B1  | C1  | -157.0(2) |
| C62 | C60 | C61 | F3  | 18.2(4)    | C30 | C25 | B1  | C9  | 80.4(3)   |
| C63 | S1  | C64 | C35 | 2.5(3)     | C30 | C25 | B1  | C17 | -44.5(3)  |
| C63 | S1  | C64 | C65 | -          | C30 | C29 | C31 | F9  | -131.6(3) |
|     |     |     |     | 179.79(19) |     |     |     |     |           |
| C63 | C57 | C58 | C59 | 3.3(4)     | C30 | C29 | C31 | F15 | 109.1(3)  |
| C64 | S1  | C63 | C57 | 2.0(3)     | C30 | C29 | C31 | F30 | -12.5(4)  |
| C64 | S1  | C63 | C62 | -177.6(2)  | C31 | C29 | C30 | C25 | -179.5(2) |
| C64 | C35 | C56 | C51 | 179.1(2)   | C32 | C27 | C28 | C29 | 179.4(2)  |
| C64 | C35 | C56 | C57 | 0.2(4)     | B1  | C1  | C2  | C3  | 167.5(2)  |
| C64 | C65 | C66 | C33 | 0.0(4)     | B1  | C1  | C6  | C5  | -168.4(2) |
| C64 | C65 | C66 | C67 | 179.0(2)   | B1  | C9  | C10 | C11 | -176.1(2) |
| C65 | C66 | C67 | F4  | 125.3(3)   | B1  | C9  | C14 | C13 | 175.5(2)  |
| C65 | C66 | C67 | F5  | 4.8(4)     | B1  | C17 | C18 | C19 | 164.8(2)  |
| C65 | C66 | C67 | F6  | -116.1(3)  | B1  | C17 | C22 | C21 | -164.7(3) |
| C66 | C33 | C34 | C35 | -0.3(4)    | B1  | C25 | C26 | C27 | 175.1(2)  |
| C1  | C2  | C3  | C4  | 2.0(4)     | B1  | C25 | C30 | C29 | -174.6(2) |

## Mössbauer and EPR spectroscopy

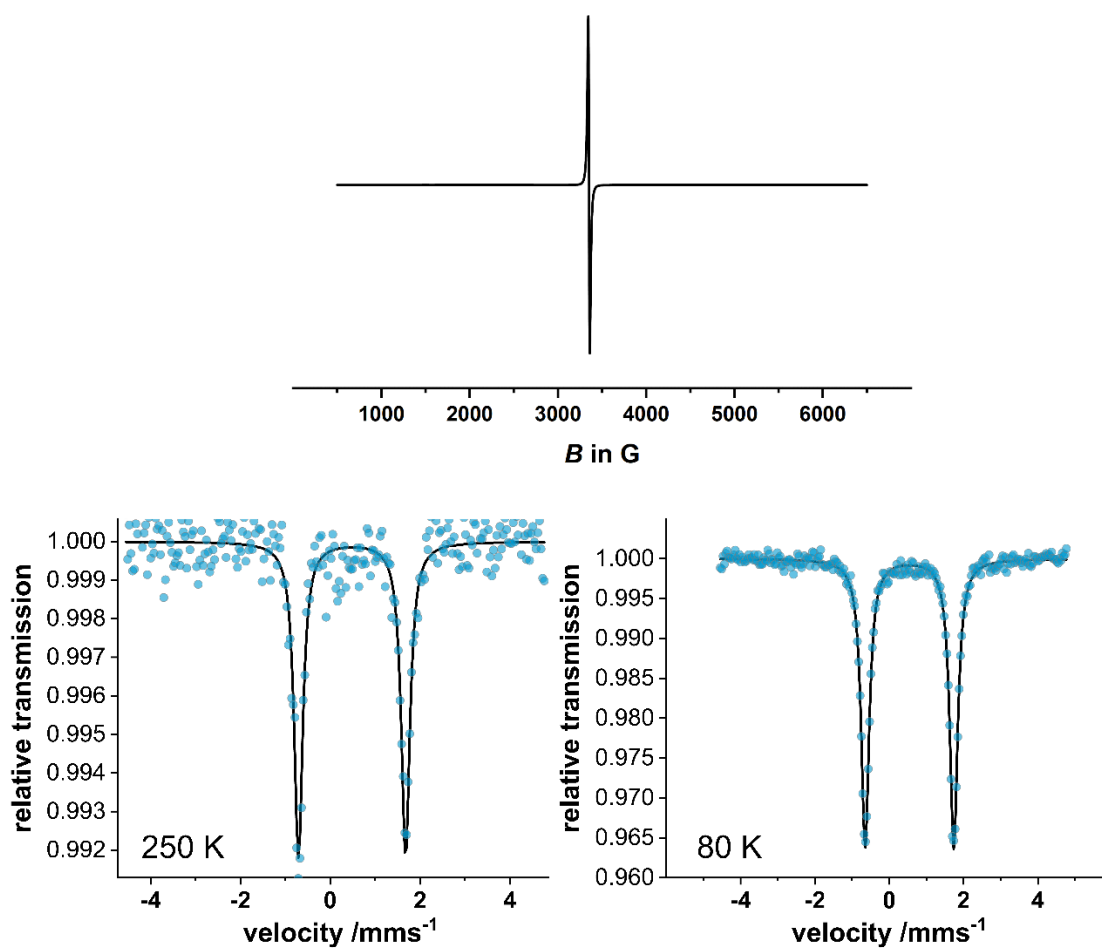

**Figure S12** | Top: EPR spectrum of  $\text{FcDurSXanth}^{\text{CF}_3^+} \text{BAR}^{\text{F}_24^-}$  in frozen  $\text{CH}_2\text{Cl}_2$  at 10 K. Bottom left: Mössbauer spectrum of a solid sample of  $\text{FcDurSXanth}^{\text{CF}_3^+} \text{BAR}^{\text{F}_24^-}$  at 250 K. Bottom right: Mössbauer spectrum of a solid sample of  $\text{FcDurSXanth}^{\text{CF}_3^+} \text{BAR}^{\text{F}_24^-}$  at 80 K.

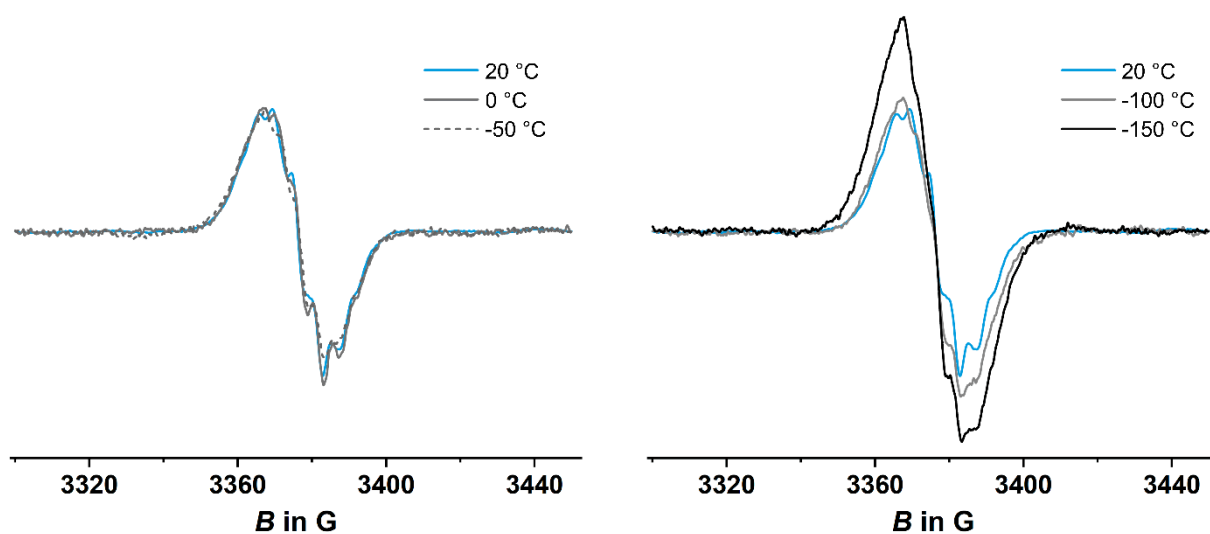

**Figure S13** |  $T$ -dependent solid state EPR spectra of  $\text{FcDurSXanth}^{\text{CF}_3^+}$  recorded from a single crystalline sample.

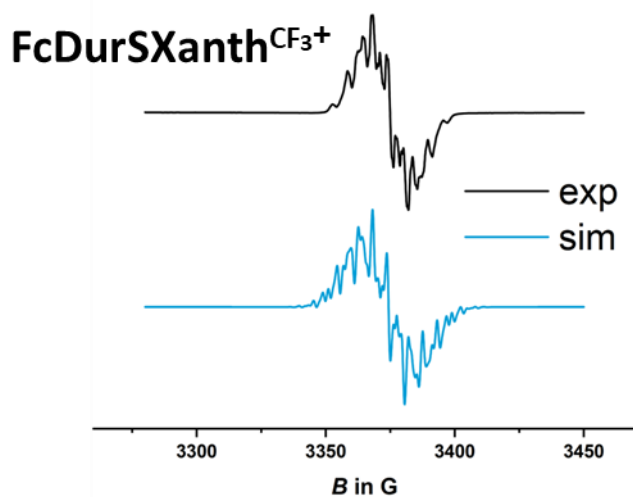

**Figure S14** | Experimental EPR spectra (top, black) of cationic, diradical species of  $\text{FcDurSXanth}^{\text{CF}_3^+}$  (sample concentration 10 mM) in  $\text{CH}_2\text{Cl}_2$  at 223 K including respective simulations (bottom, blue).

**Table S6** | EPR spectroscopic data obtained by simulations.<sup>24</sup>

|                                                                  | $T$<br>(°C) | $g$ -value | $hfs$ ( $^1\text{H}$ ) in<br>$\text{G}^{[b]}$ |
|------------------------------------------------------------------|-------------|------------|-----------------------------------------------|-----------------------------------------------|-----------------------------------------------|-----------------------------------------------|
| <b><math>\text{FcDurSXanth}^{\text{CF}_3^{\text{[a]}}</math></b> | -50         | 2.0047     | 16.0 (6)                                      | 15.0 (2)                                      | 12.8 (2)                                      | 9.8 (6)                                       |

[a] Diradical isomer content in the cationic species. [b] Number of equivalent protons in parentheses.

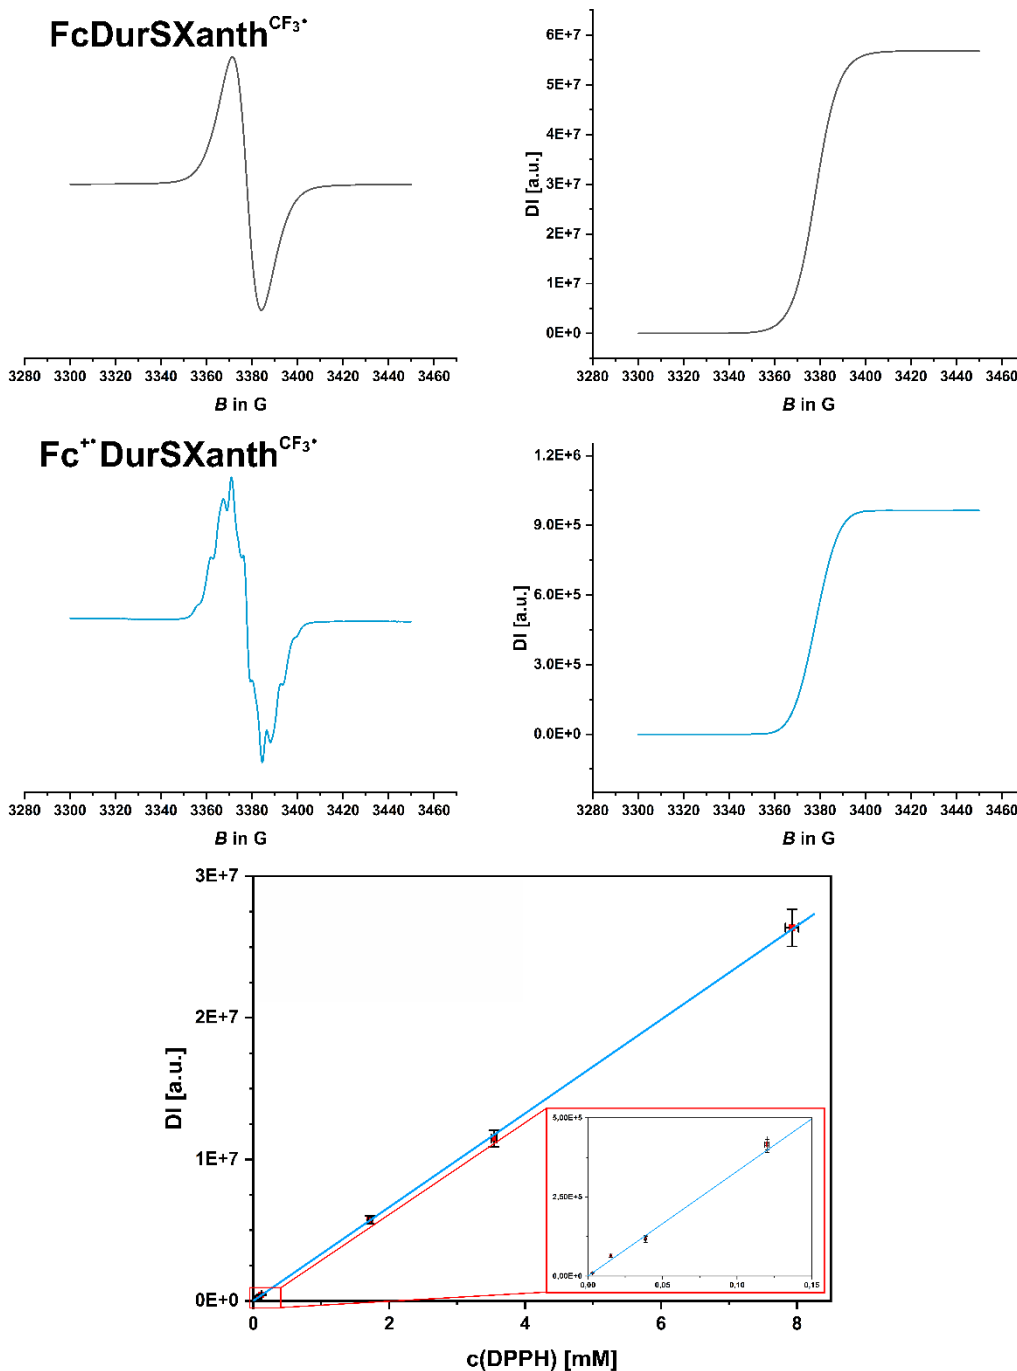

**Figure S15** | Quantitative EPR spectroscopy. Top panel: EPR spectrum (left) of a CH<sub>2</sub>Cl<sub>2</sub> solution of the **FcDurSXanth<sup>CF<sub>3</sub>•</sup>** radical ( $c = 20$  mM,  $T = 293$  K) measured at standardized conditions and instrument settings; right: double integral of the EPR resonance signal. Middle panel: EPR spectrum (left) of a CH<sub>2</sub>Cl<sub>2</sub> solution of **FcDurSXanth<sup>CF<sub>3</sub>•</sup> BAR<sup>F<sub>24</sub>-</sup>** ( $c = 20$  mM,  $T = 293$  K) measured at standardized conditions and instrument settings; right: double integral of the EPR resonance signal. Value of the double integral of EPR spectra of CH<sub>2</sub>Cl<sub>2</sub> solutions of variously concentrated solutions of the dpph<sup>•</sup> radical standard at  $T = 293$  K. The EPR spectra of the dpph<sup>•</sup> standard were recorded under the same standardized conditions and instrument settings as above. For full details of the employed procedure, see ref. 6.

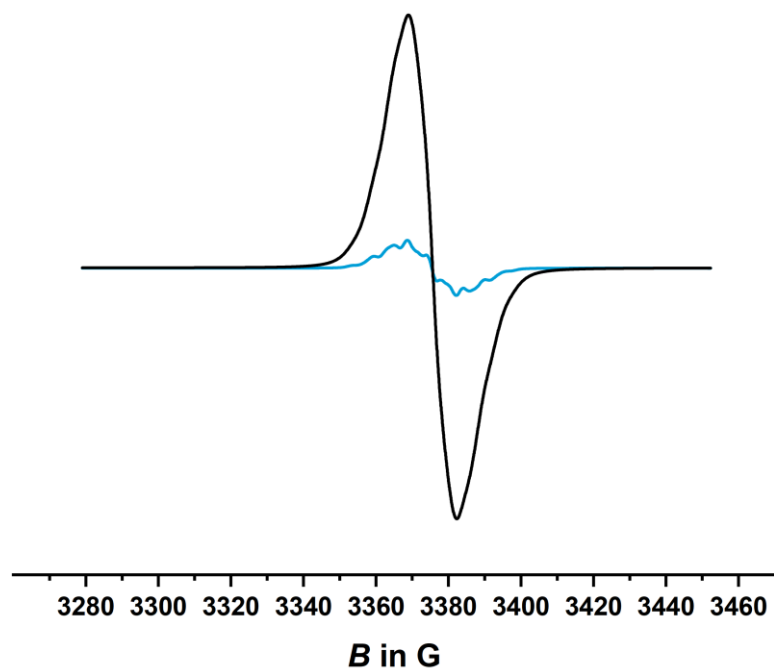

**Figure S16** | Comparison of the EPR spectrum of a 10 M solution of the  $\text{FcDurSXanth}^{\text{CF}_3+}$  cation (blue line) and of an equally concentrated solution of chemically reduced  $\text{FcDurSXanth}^{\text{CF}_3\cdot}$  (black line) at  $T = 293$  K.

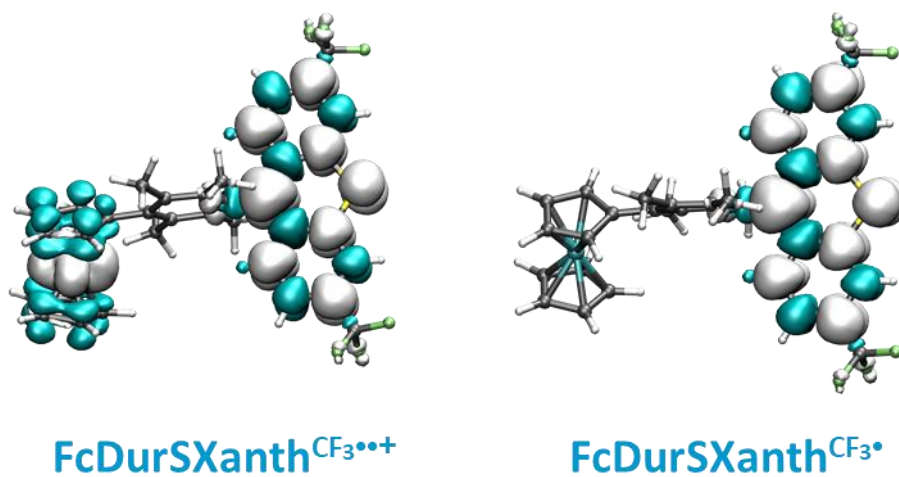

**Figure S17** | DFT-calculated spin-density distributions for the diradical valence tautomer of  $\text{FcDurSXanth}^{\text{CF}_3^{\bullet\bullet+}}$  and the one-electron reduced form  $\text{FcDurSXanth}^{\text{CF}_3^\bullet}$ .



## References

- 1 L. A. Casper, M. Linseis, S. Demeshko, M. Azarkh, M. Drescher and R. F. Winter, *Chem. Eur. J.*, 2021, **27**, 10854-10868.
- 2 D. L. Reger, T. D. Wright, C. A. Little, J. J. Lamba and M. D. Smith, *Inorg. Chem.*, 2001, **40**, 3810–3814.
- 3 Y. Li, M. Josowicz and L. M. Tolbert, *J. Am. Chem. Soc.*, 2010, **132**, 10374–10382.
- 4 M. Brookhart, B. Grant and A. F. Volpe, *Organometallics*, 1992, **11**, 3920–3922.
- 5 magnettech by Freiberg Instruments, *Manual and documentation MiniScope MS5000 and MS5000X. EPR spectrometer with scientific grade performance*, Berlin, Germany, 6th edn., 2018.
- 6 L. A. Casper, L. Wursthorn, M. Geppert, P. Roser, M. Linseis, M. Drescher and R. F. Winter, *Organometallics*, 2020, **39**, 3275–3289.
- 7 S. Stoll and A. Schweiger, *J. Magn. Reson.*, 2006, **178**, 42–55.
- 8 S. S. Eaton and G. R. Eaton, *Bull. Magn. Reson.*, 1980, **1**, 130–138.
- 9 E. Bill, *MFit*, **2008**, Max-Planck Institute for Chemical Energy Conversion: Mülheim/Ruhr, Germany.
- 10 O. V. Dolomanov, L. J. Bourhis, R. J. Gildea, J. A. K. Howard and H. Puschmann, *J. Appl. Crystallogr.*, 2009, **42**, 339–341.
- 11 G. M. Sheldrick, *Acta Crystallogr. A*, 2015, **71**, 3–8.
- 12 G. M. Sheldrick, *Acta Crystallogr. C*, 2015, **71**, 3–8.
- 13 L. A. Casper, V. Ebel, M. Linseis and R. F. Winter, *Dalton Trans.*, 2021, **50**, 15336-15351.
- 14 M. J. Frisch, G. W. Trucks, H. B. Schlegel, G. E. Scuseria, M. A. Robb, J. R. Cheeseman, G. Scalmani, V. Barone, G. A. Petersson, H. Nakatsuji, X. Li, M. Caricato, A. V. Marenich, J. Bloino, B. G. Janesko, R. Gomperts, B. Mennucci, H. P. Hratchian, J. V. Ortiz, A. F. Izmaylov, J. L. Sonnenberg, Williams, F. Ding, F. Lipparini, F. Egidi, J. Goings, B. Peng, A. Petrone, T. Henderson, D. Ranasinghe, V. G. Zakrzewski, J. Gao, N. Rega, G. Zheng, W. Liang, M. Hada, M. Ehara, K. Toyota, R. Fukuda, J. Hasegawa, M. Ishida, T. Nakajima, Y. Honda, O. Kitao, H. Nakai, T. Vreven, K. Throssell, J. A. Montgomery Jr., J. E. Peralta, F. Ogliaro, M. J. Bearpark, J. J. Heyd, E. N. Brothers, K. N. Kudin, V. N. Staroverov, T. A. Keith, R. Kobayashi, J. Normand, K. Raghavachari, A. P. Rendell, J. C. Burant, S. S. Iyengar, J. Tomasi, M. Cossi, J. M. Millam, M. Klene, C. Adamo, R. Cammi, J. W. Ochterski, R. L. Martin, K. Morokuma, O. Farkas, J. B. Foresman and D. J. Fox, *Gaussian 16 Rev. C.01*, Wallingford, CA, USA, 2016.
- 15 M. Cossi, N. Rega, G. Scalmani and V. Barone, *J. Comput. Chem.*, 2003, **24**, 669–681.
- 16 B. P. Pritchard, D. Altarawy, B. Didier, T. D. Gibson and T. L. Windus, *J. Chem. Inf. Mod.*, 2019, **59**, 4814–4820.
- 17 P. C. Hariharan and J. A. Pople, *Theoret. Chim. Acta*, 1973, **28**, 213–222.
- 18 J. P. Perdew, K. Burke and M. Ernzerhof, *Phys. Rev. Lett.*, 1996, **77**, 3865–3868.
- 19 C. Adamo and V. Barone, *J. Chem. Phys.*, 1999, **110**, 6158–6170.
- 20 N. M. O'Boyle, A. L. Tenderholt and K. M. Langner, *J. Comput. Chem.*, 2008, **29**, 839–845.
- 21 M. D. Hanwell, D. E. Curtis, D. C. Lonie, T. Vandermeersch, E. Zurek and G. R. Hutchison, *J. Chem. Inf.*, 2012, **4**, 1–17.
- 22 O. Tange, *The USENIX Magazine*, 2011, **36**, 42.
- 23 S. Oßwald, Dissertation, University of Konstanz, 2019.
- 24 *Matlab*, TheMathWorks Inc.
